# Supplementary material
Source: MDPI journal article supplement (https://www.mdpi.com/2227-9717/8/2/218)
Supplement: s1 [file s1]

# **SUPPORTING INFORMATION**

## **Comparing Composition Control Structures for Kaibel Distillation Columns**

**Yang Yuan, Kejin Huang\*, Haisheng Chen,**

**Xing Qian, Lijing Zang, Liang Zhang, and Shaofeng Wang**

*College of Information Science and Technology,*

*Beijing University of Chemical Technology, Beijing 100029, P. R. China*

---

\* Phone: +86-10-64437805. Fax: +86-10-64437805. E-mail: huangkj@mail.buct.edu.cn.

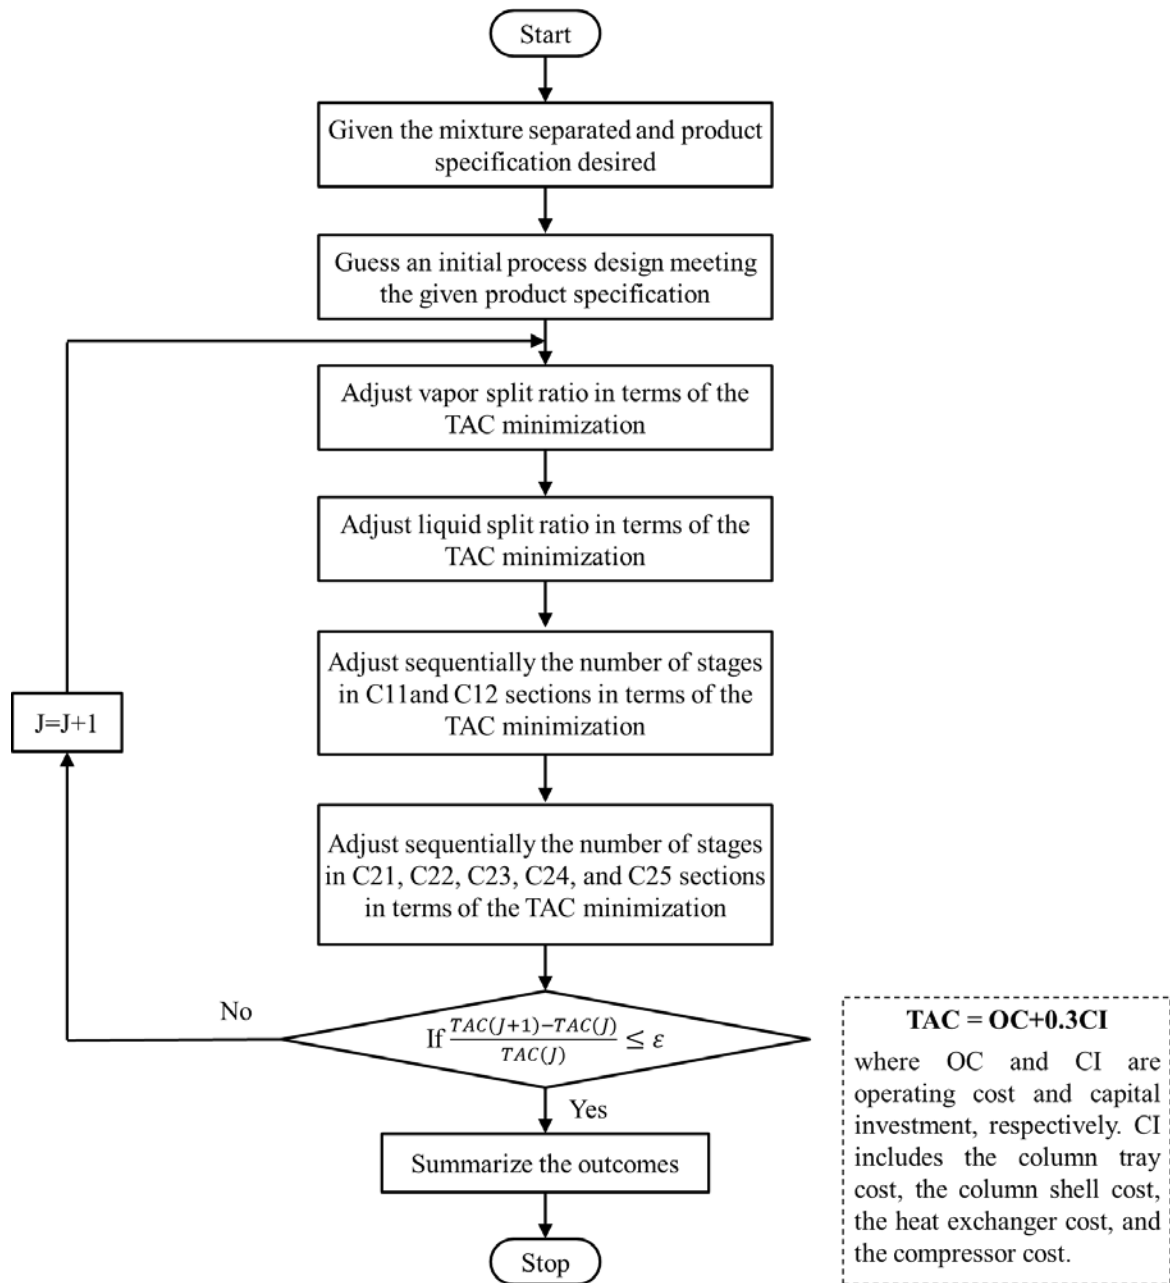

**Figure S1.** A simple sequential search algorithm for the synthesis and design of the Kaibel distillation column

**Table S1.** Column dimensions of the MEPB Kaibel distillation column

| Column    | Column shell |             | Reflux drum (Elliptical) |              | Column base (Elliptical) |              |
|-----------|--------------|-------------|--------------------------|--------------|--------------------------|--------------|
|           | Diameter (m) | Spacing (m) | Length (m)               | Diameter (m) | Length (m)               | Diameter (m) |
| C1 Column | 0.11         | 0.6096      | 0.455                    | 0.227        | 0.478                    | 0.239        |
| C2 Column | 0.076        | 0.6096      | -                        | -            | 0.375                    | 0.188        |
| C3 Column | 0.11         | 0.6096      | -                        | -            | 0.578                    | 0.289        |
| P Column  | 0.083        | 0.6096      | -                        | -            | 0.486                    | 0.243        |

\*The C1, C2, C3 and P columns are labeled in Figure 4 of the main manuscript

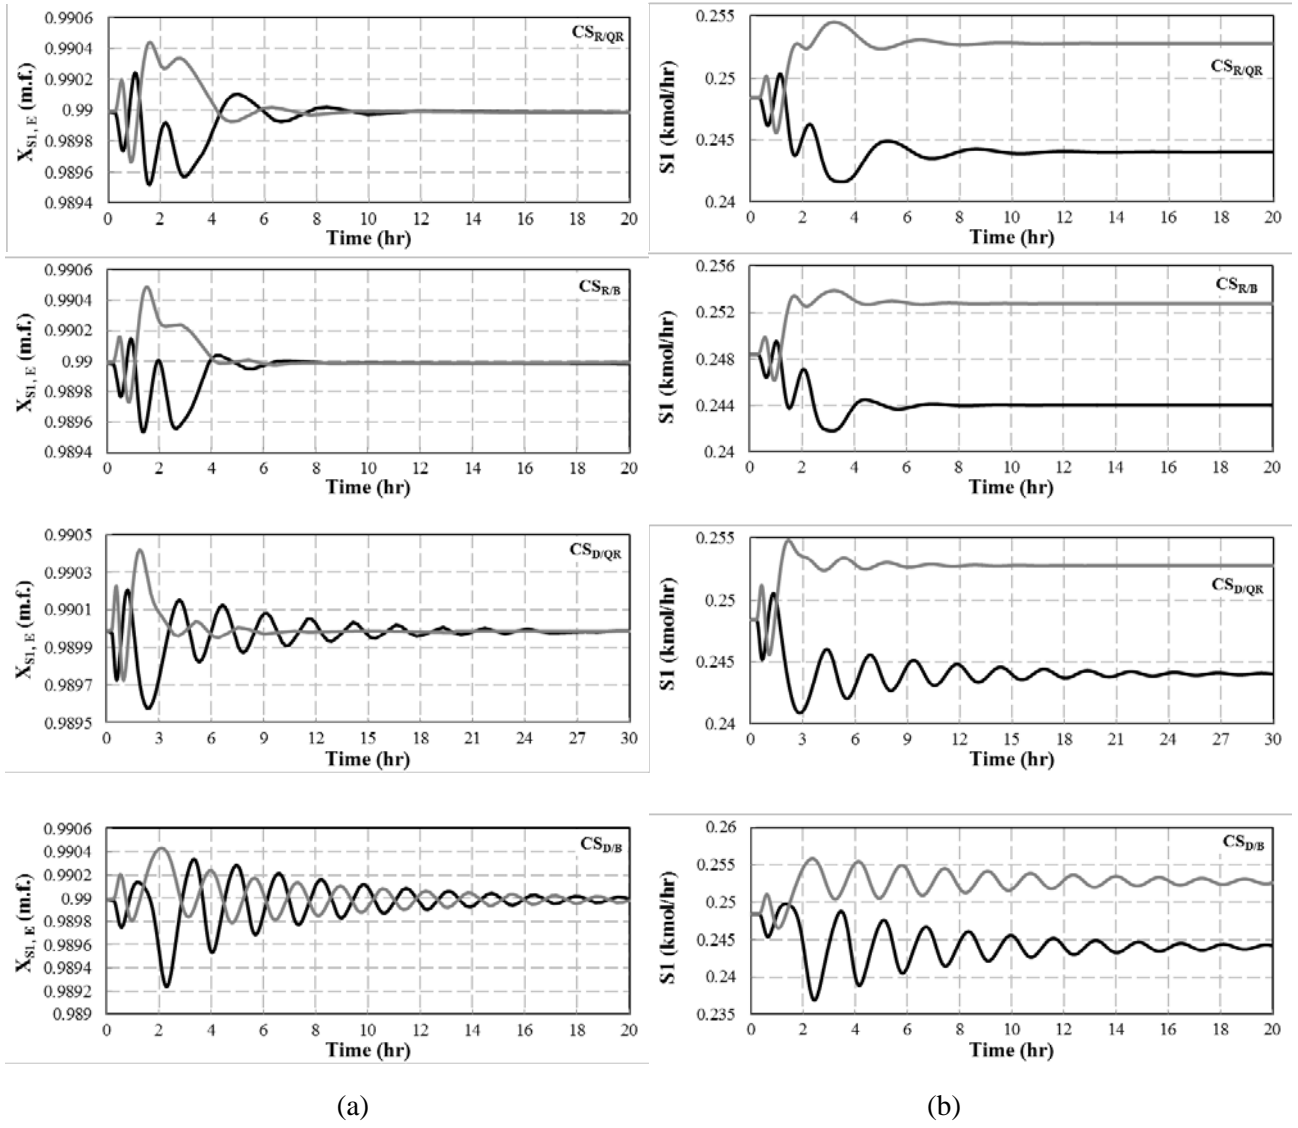

**Figure S2.** Dynamic responses of the upper sidestream control loop of the MEPB Kaibel distillation column controlled, respectively, under the  $CS_{R/QR}$ ,  $CS_{R/B}$ ,  $CS_{D/QR}$ , and  $CS_{D/B}$  structures after facing a  $\pm 5\%$  step change in M feed composition ( $+5\%$ : black curves and  $-5\%$ : grey curves): (a) controlled variables; (b) manipulated variables.

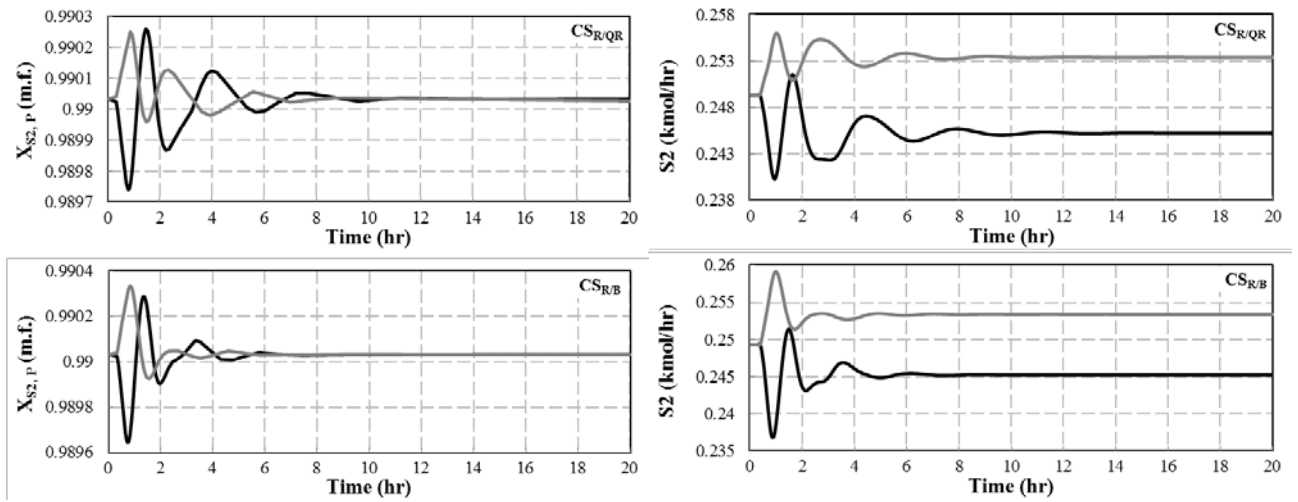

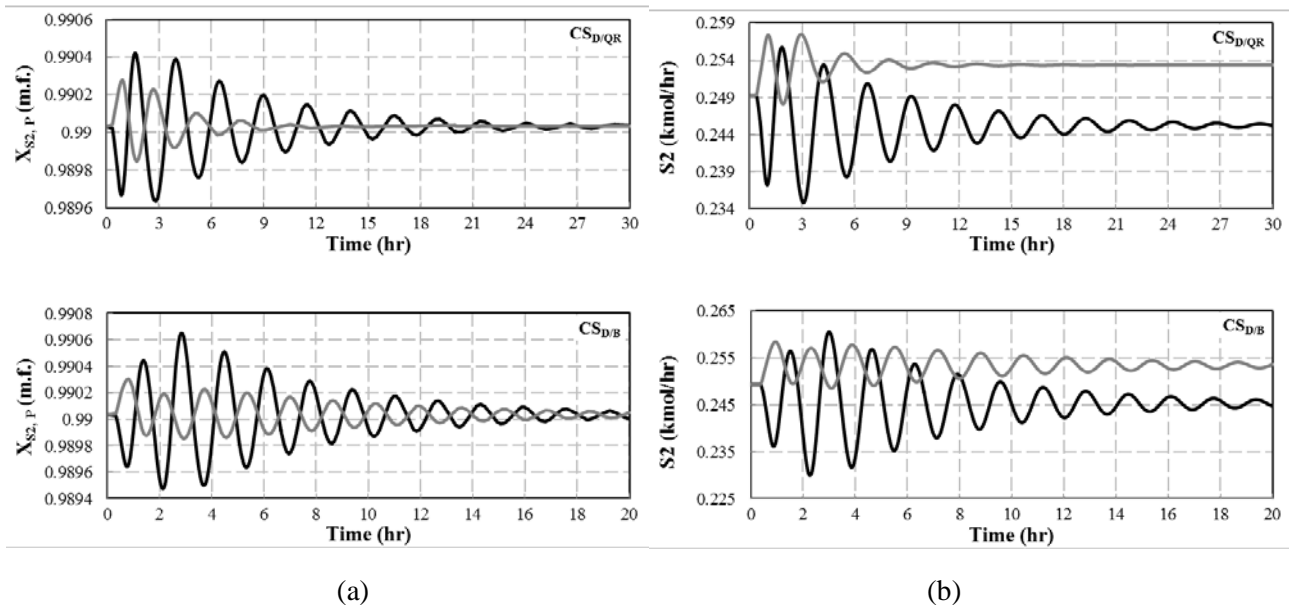

**Figure S3.** Dynamic responses of the lower sidestream control loop of the MEPB Kaibel distillation column controlled, respectively, under the  $CS_{R/QR}$ ,  $CS_{R/B}$ ,  $CS_{D/QR}$ , and  $CS_{D/B}$  structures after facing a  $\pm 5\%$  step change in M feed composition (+5%: black curves and -5%: grey curves): (a) controlled variables; (b) manipulated variables.

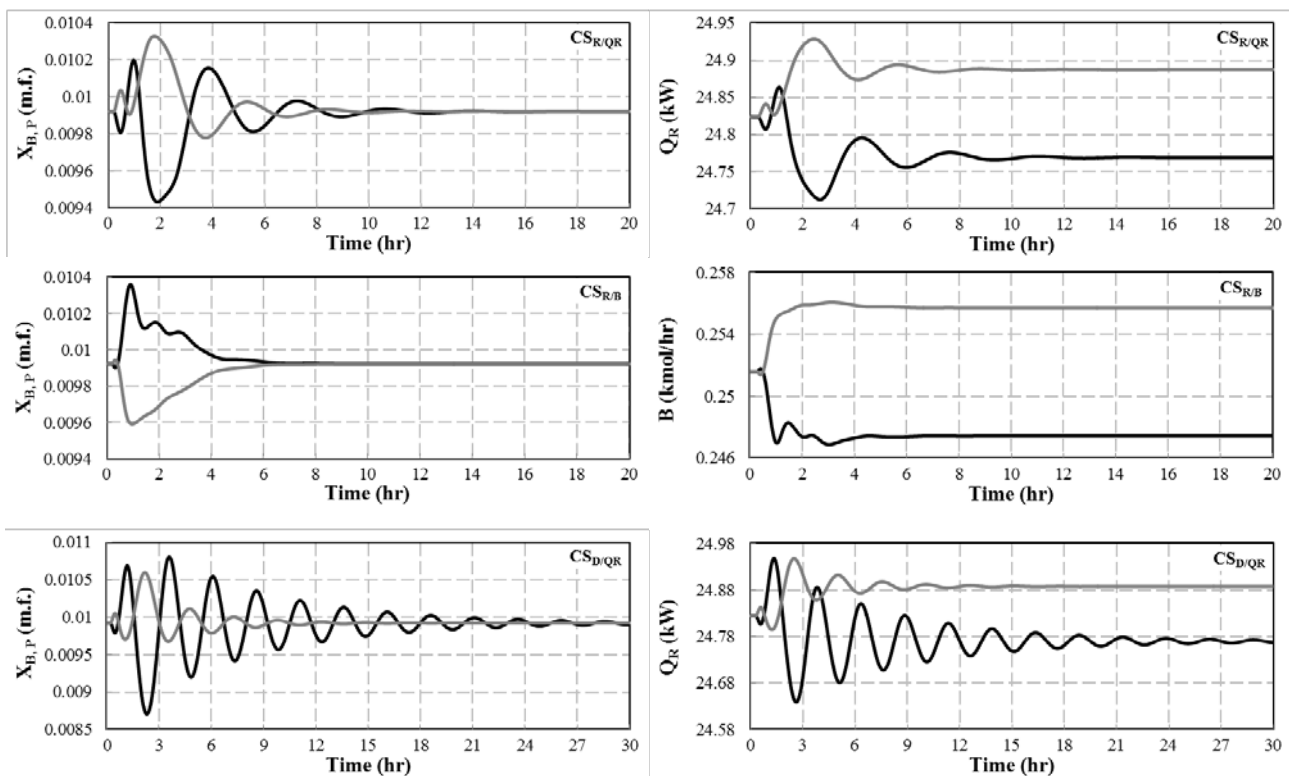

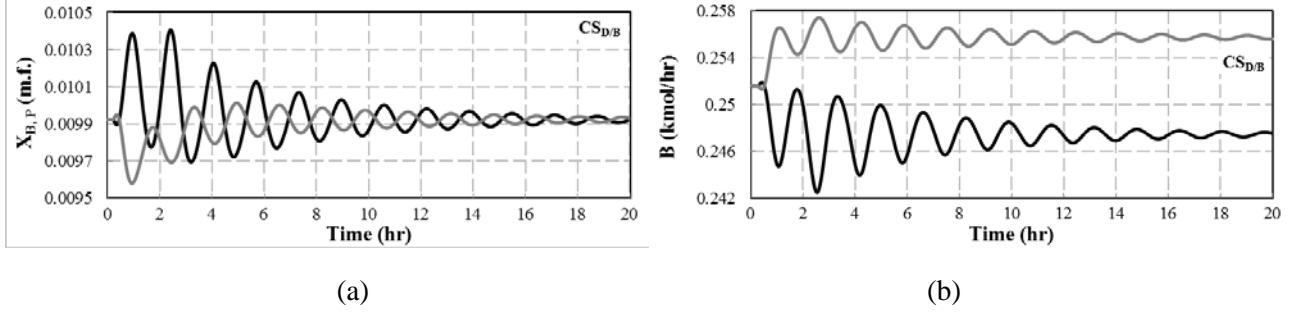

**Figure S4.** Dynamic responses of the bottom control loop of the MEPB Kaibel distillation column controlled, respectively, under the  $CS_{R/QR}$ ,  $CS_{R/B}$ ,  $CS_{D/QR}$ , and  $CS_{D/B}$  structures after facing a  $\pm 5\%$  step change in M feed composition (+5%: black curves and -5%: grey curves): (a) controlled variables; (b) manipulated variables.

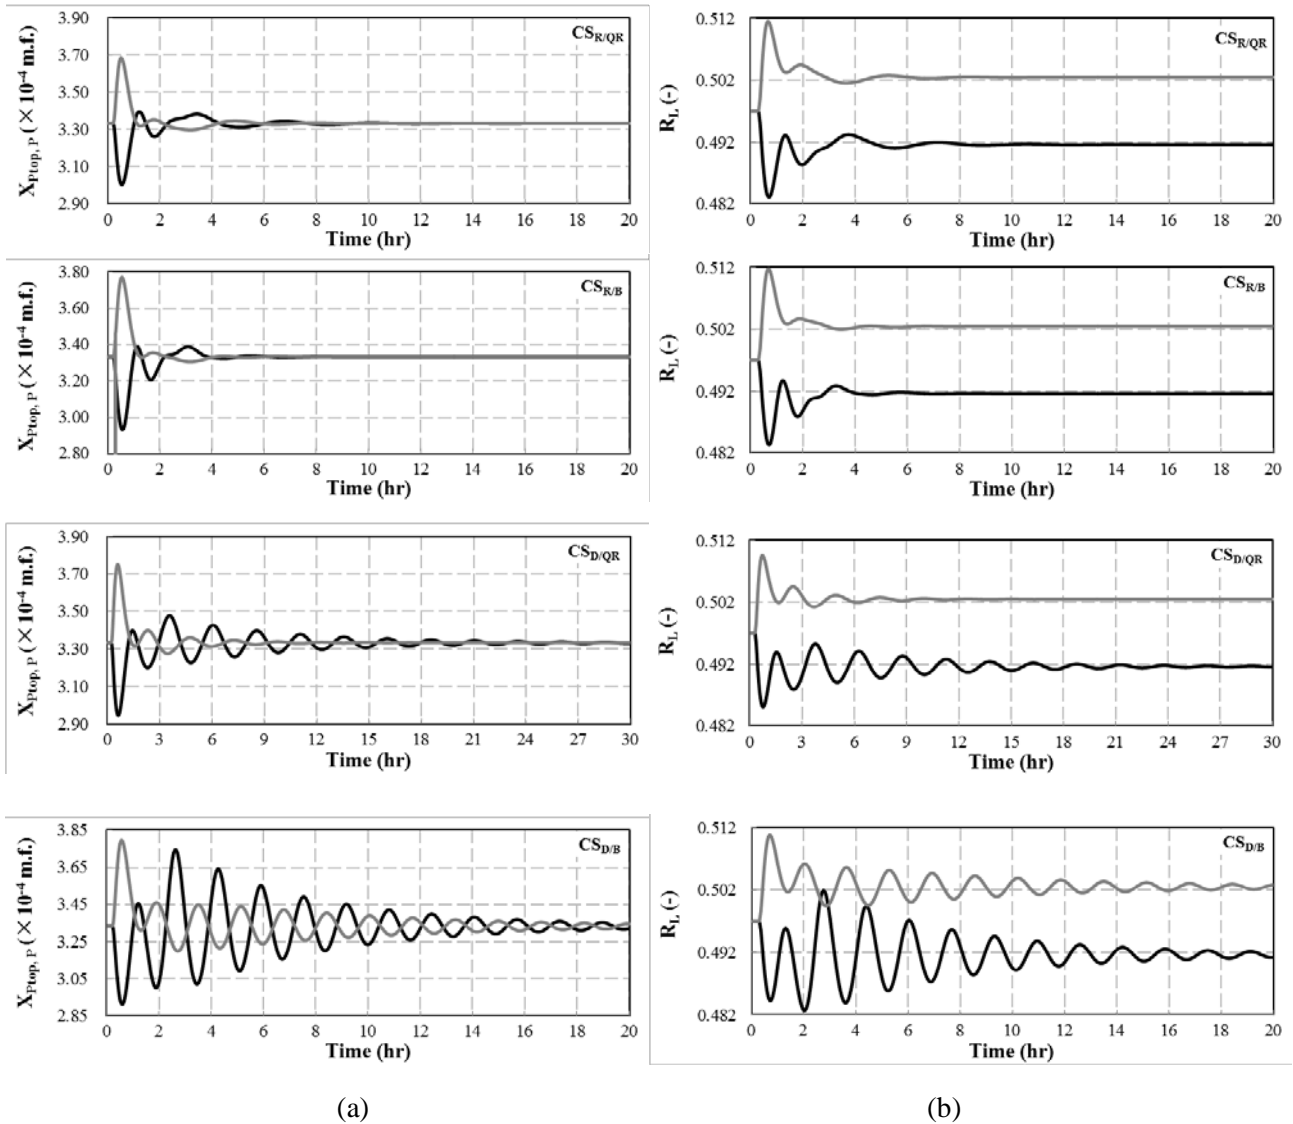

**Figure S5.** Dynamic responses of the prefractionator control loop of the MEPB Kaibel distillation column controlled, respectively, under the  $CS_{R/QR}$ ,  $CS_{R/B}$ ,  $CS_{D/QR}$ , and  $CS_{D/B}$  structures after facing a  $\pm 5\%$  step change in M feed composition (+5%: black curves and -5%: grey curves): (a) controlled variables; (b) manipulated variables.

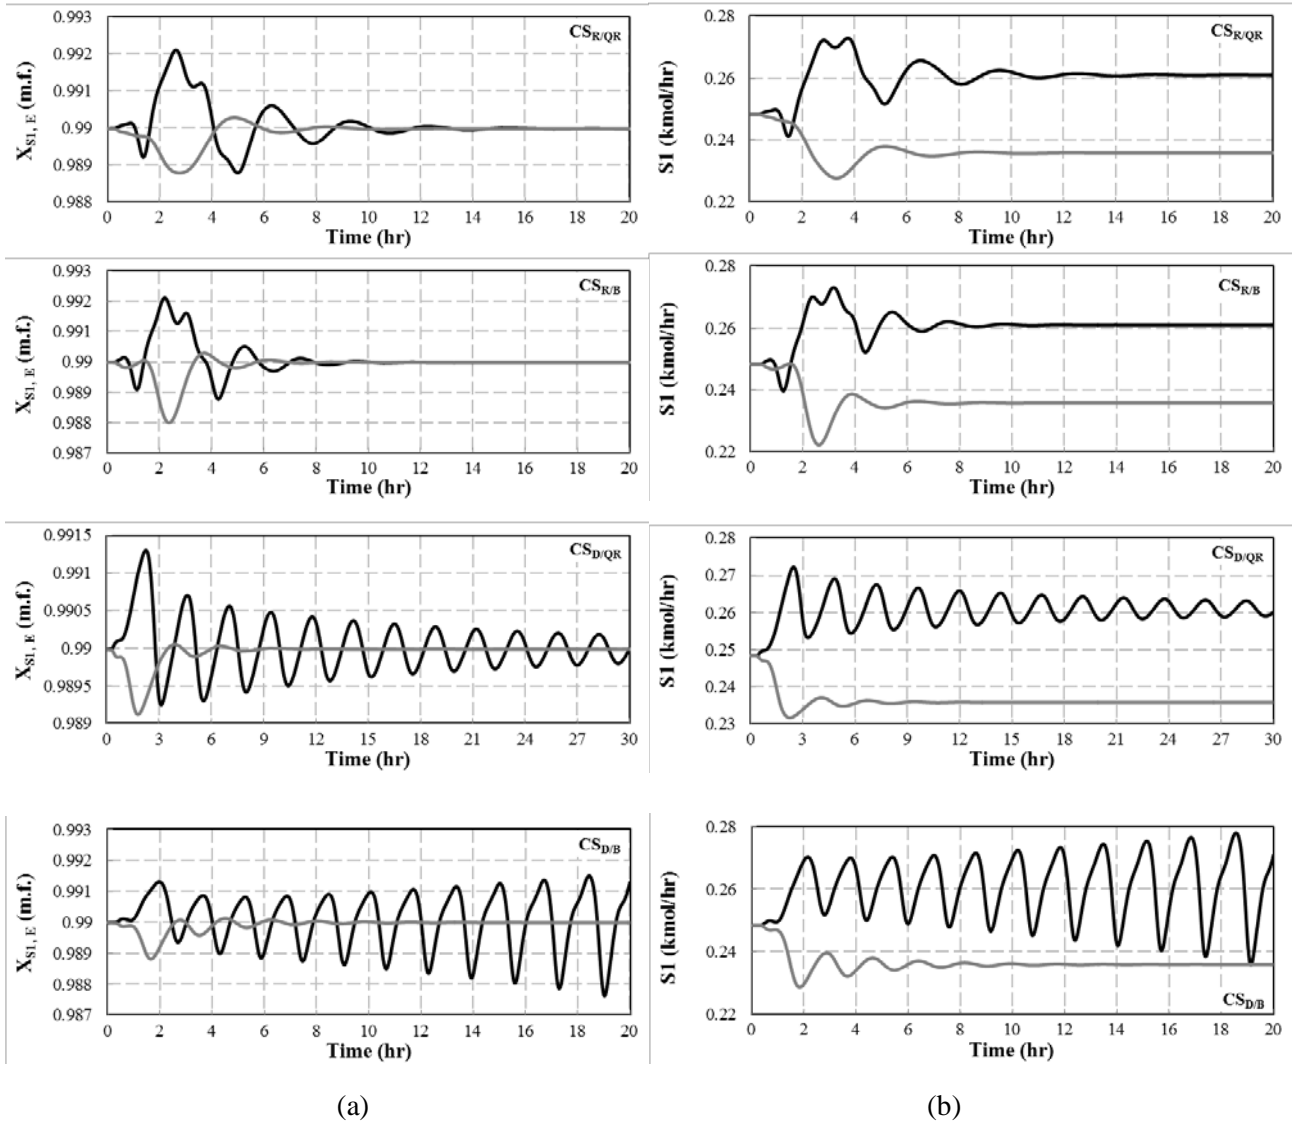

**Figure S6.** Dynamic responses of the upper sidestream control loop of the MEPB Kaibel distillation column controlled, respectively, under the  $CS_{R/QR}$ ,  $CS_{R/B}$ ,  $CS_{D/QR}$ , and  $CS_{D/B}$  structures after facing a  $\pm 5\%$  step change in E feed composition (+5%: black curves and -5%: grey curves): (a) controlled variables; (b) manipulated variables.

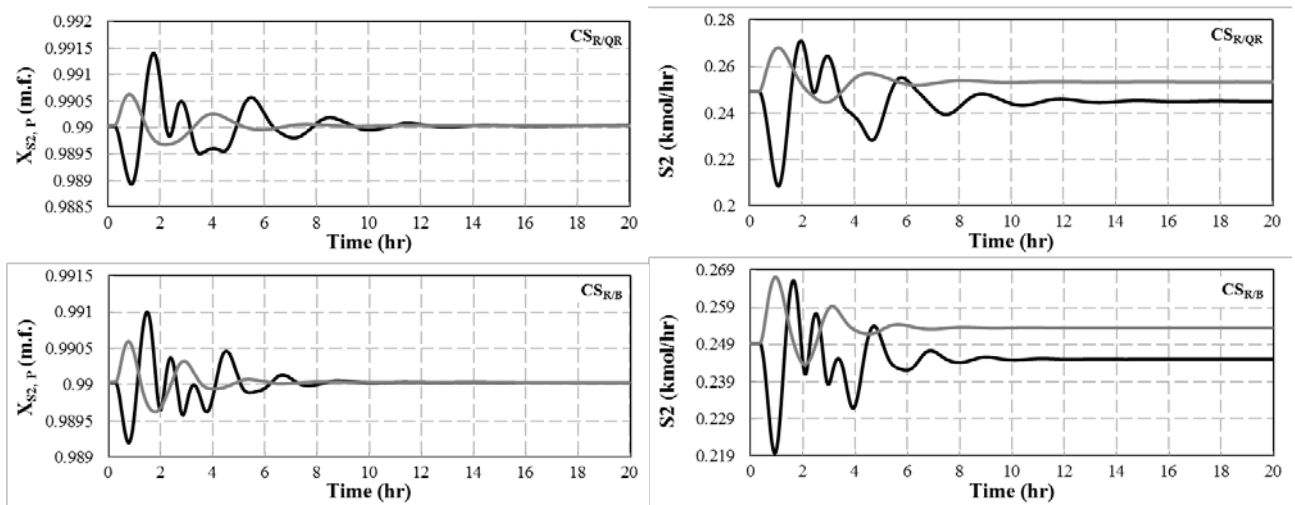

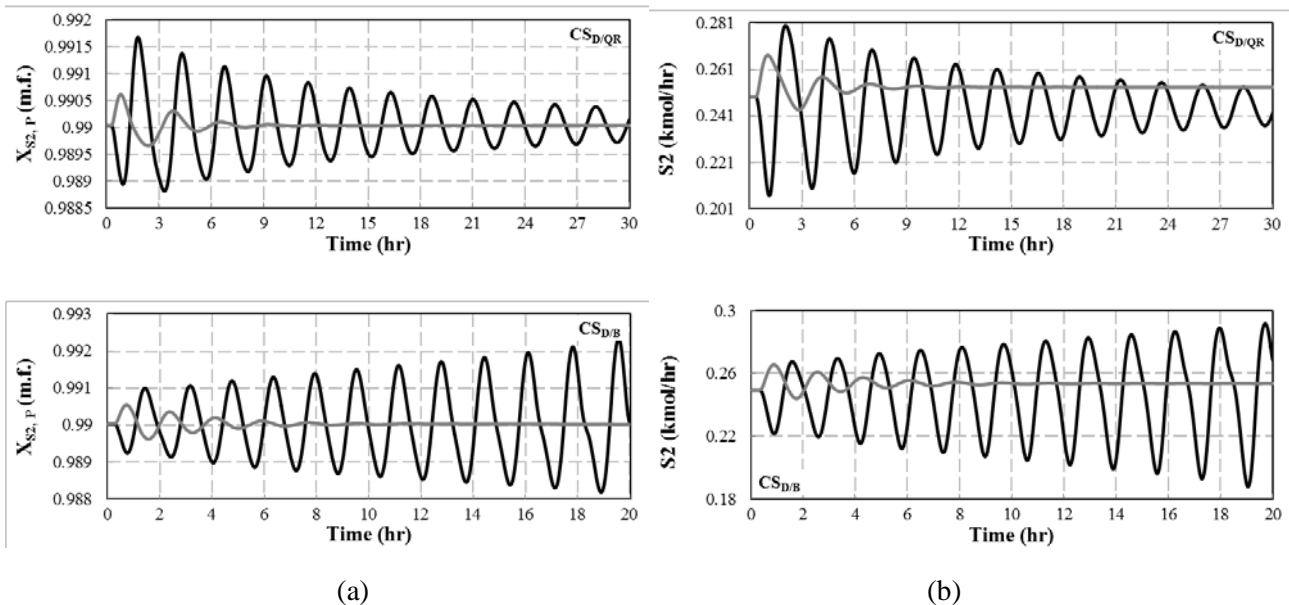

**Figure S7.** Dynamic responses of the lower sidestream control loop of the MEPB Kaibel distillation column controlled, respectively, under the  $CS_{R/QR}$ ,  $CS_{R/B}$ ,  $CS_{D/QR}$ , and  $CS_{D/B}$  structures after facing a  $\pm 5\%$  step change in  $E$  feed composition (+5%: black curves and -5%: grey curves): (a) controlled variables; (b) manipulated variables.

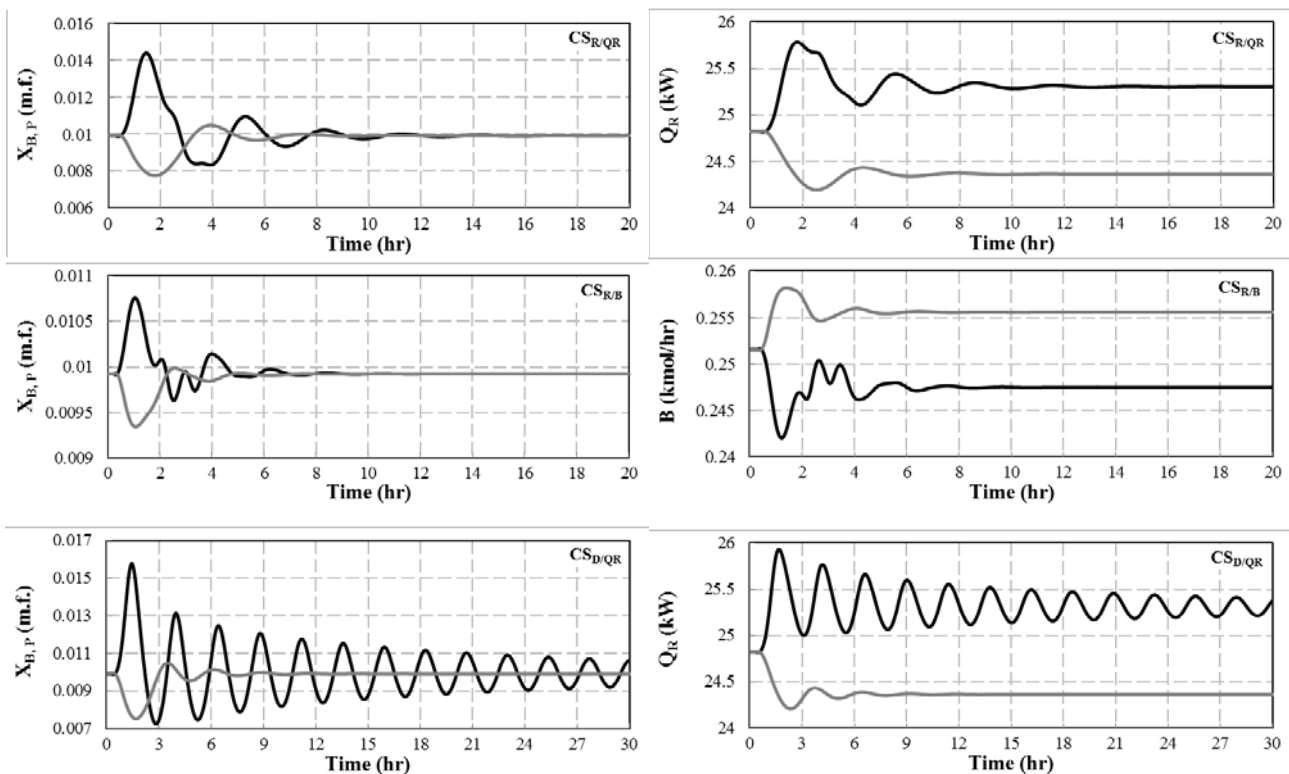

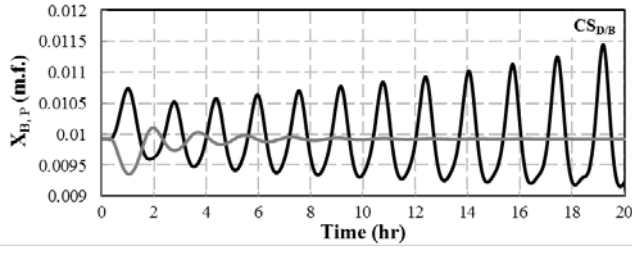

(a)

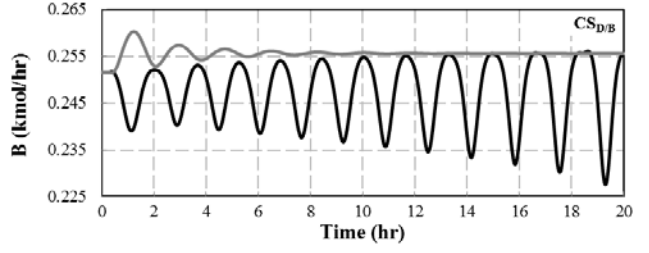

(b)

**Figure S8.** Dynamic responses of the bottom control loop of the MEPB Kaibel distillation column controlled, respectively, under the  $CS_{R/QR}$ ,  $CS_{R/B}$ ,  $CS_{D/QR}$ , and  $CS_{D/B}$  structures after facing a  $\pm 5\%$  step change in E feed composition (+5%: black curves and -5%: grey curves): (a) controlled variables; (b) manipulated variables.

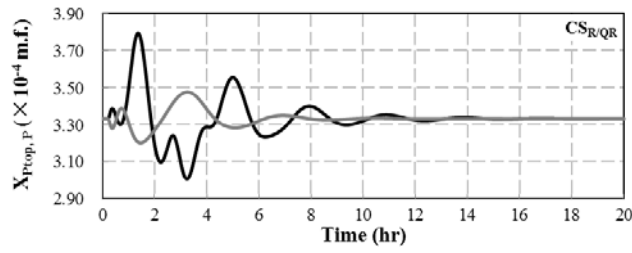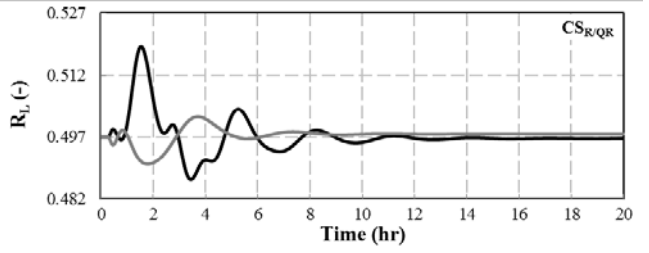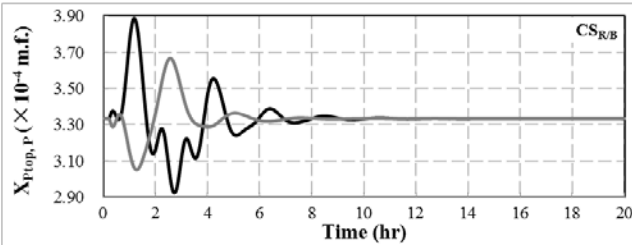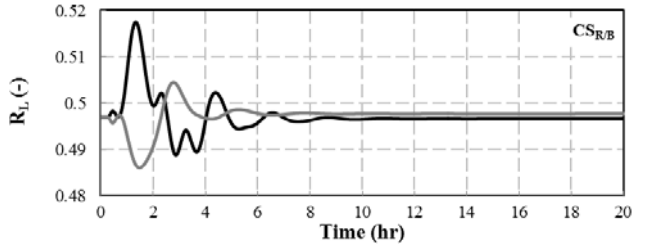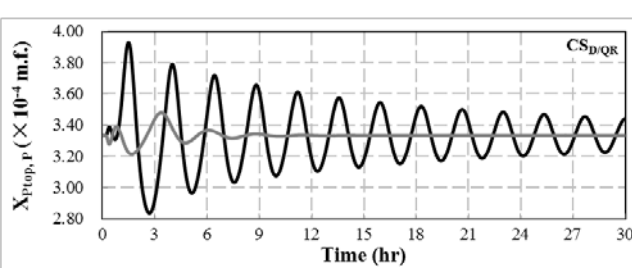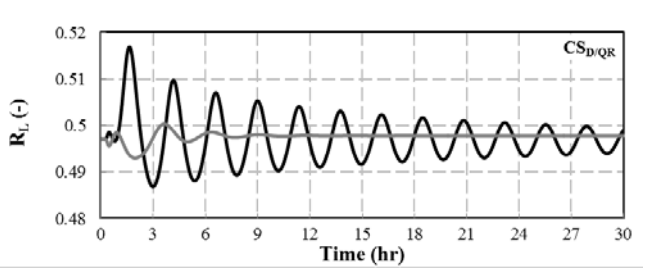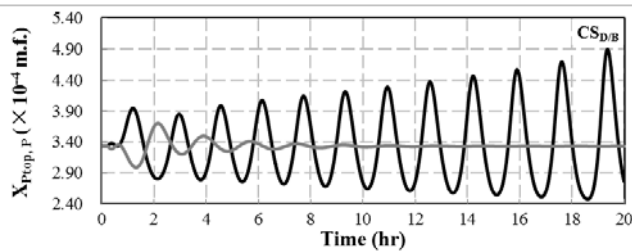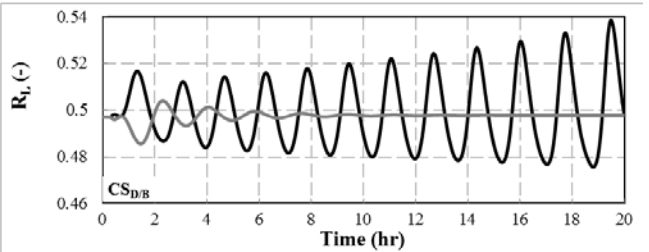

(a)

(b)

**Figure S9.** Dynamic responses of the prefractionator control loop of the MEPB Kaibel distillation column controlled, respectively, under the  $CS_{R/QR}$ ,  $CS_{R/B}$ ,  $CS_{D/QR}$ , and  $CS_{D/B}$  structures after facing a  $\pm 5\%$  step change in E feed composition (+5%: black curves and -5%: grey curves): (a) controlled variables; (b) manipulated variables.



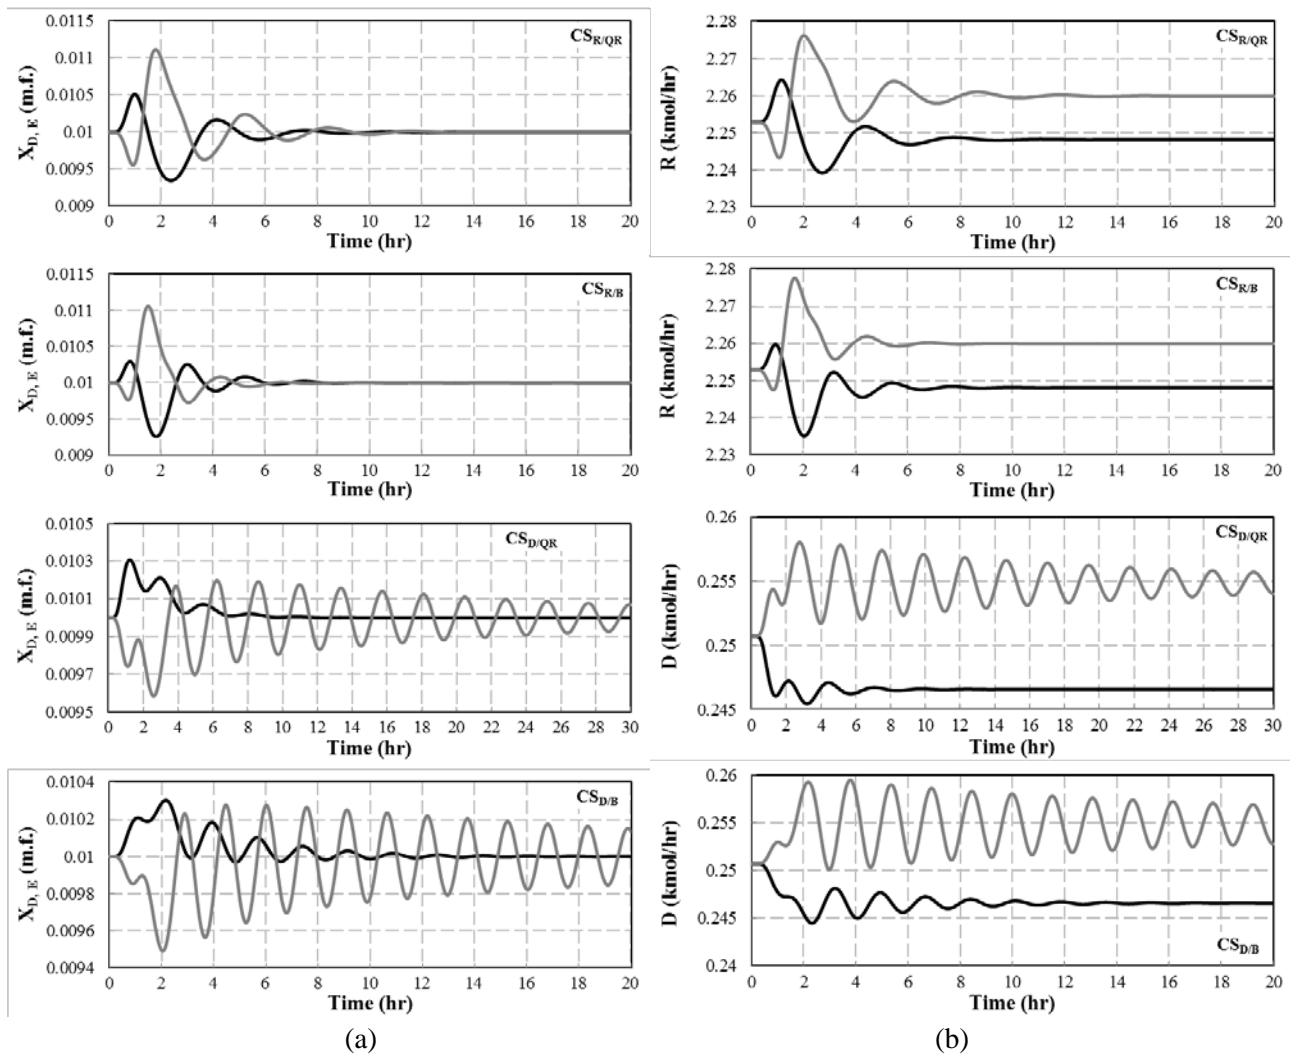

**Figure S10.** Dynamic responses of the top control loop of the MEPB Kaibel distillation column controlled, respectively, under the  $CS_{R/QR}$ ,  $CS_{R/B}$ ,  $CS_{D/QR}$ , and  $CS_{D/B}$  structures after facing a  $\pm 5\%$  step change in P feed composition ( $+5\%$ : black curves and  $-5\%$ : grey curves): (a) controlled variables; (b) manipulated variables.

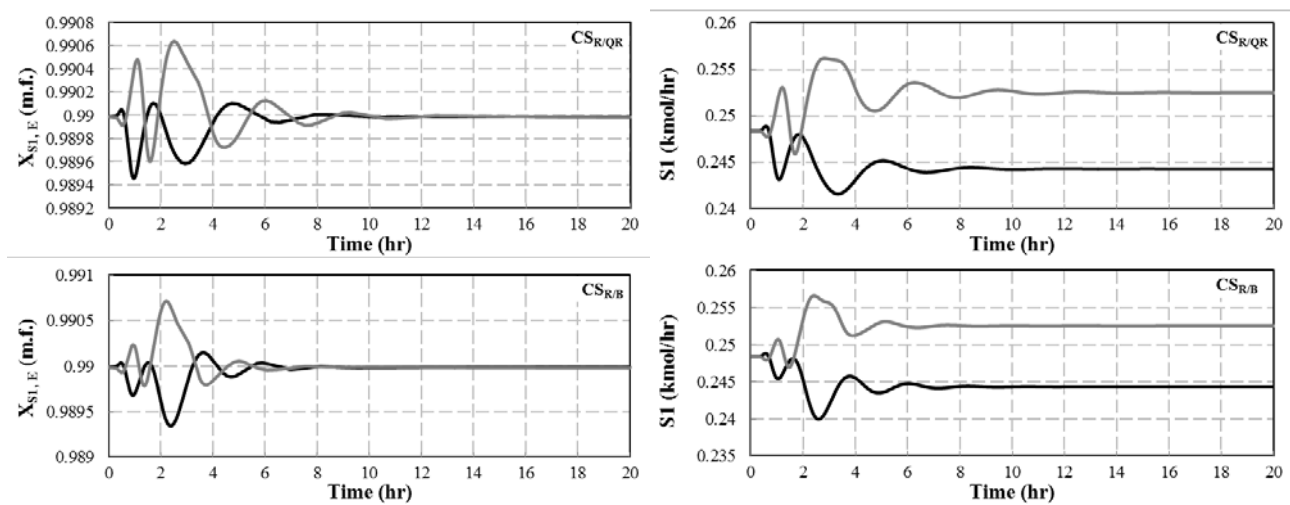

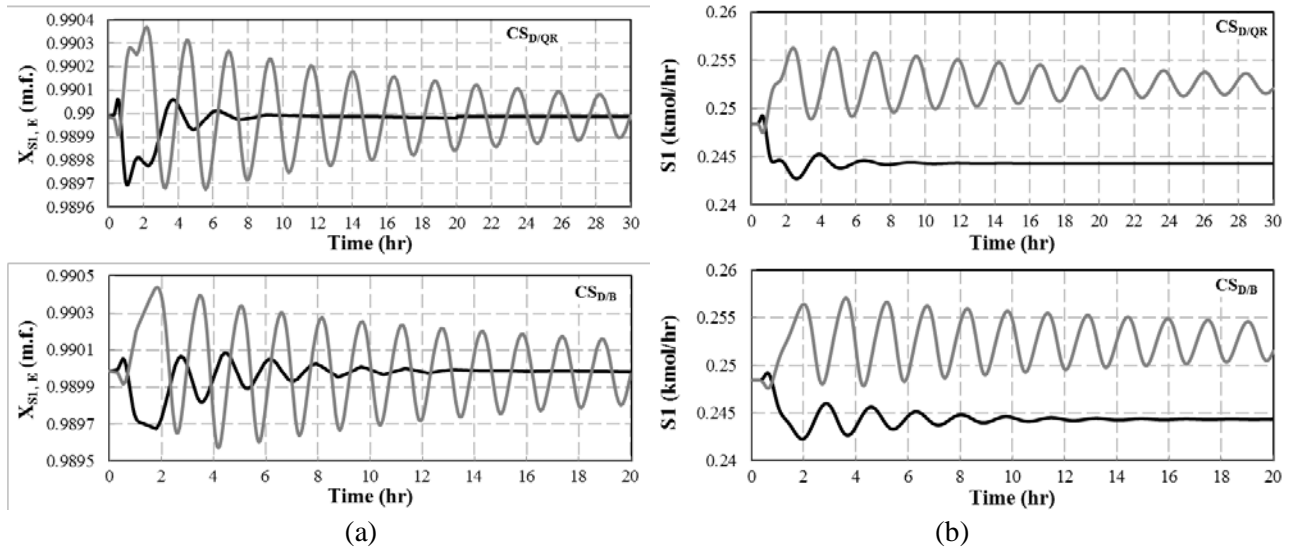

**Figure S11.** Dynamic responses of the upper sidestream control loop of the MEPB Kaibel distillation column controlled, respectively, under the  $CS_{R/QR}$ ,  $CS_{R/B}$ ,  $CS_{D/QR}$ , and  $CS_{D/B}$  structures after facing a  $\pm 5\%$  step change in  $P$  feed composition (+5%: black curves and -5%: grey curves): (a) controlled variables; (b) manipulated variables.

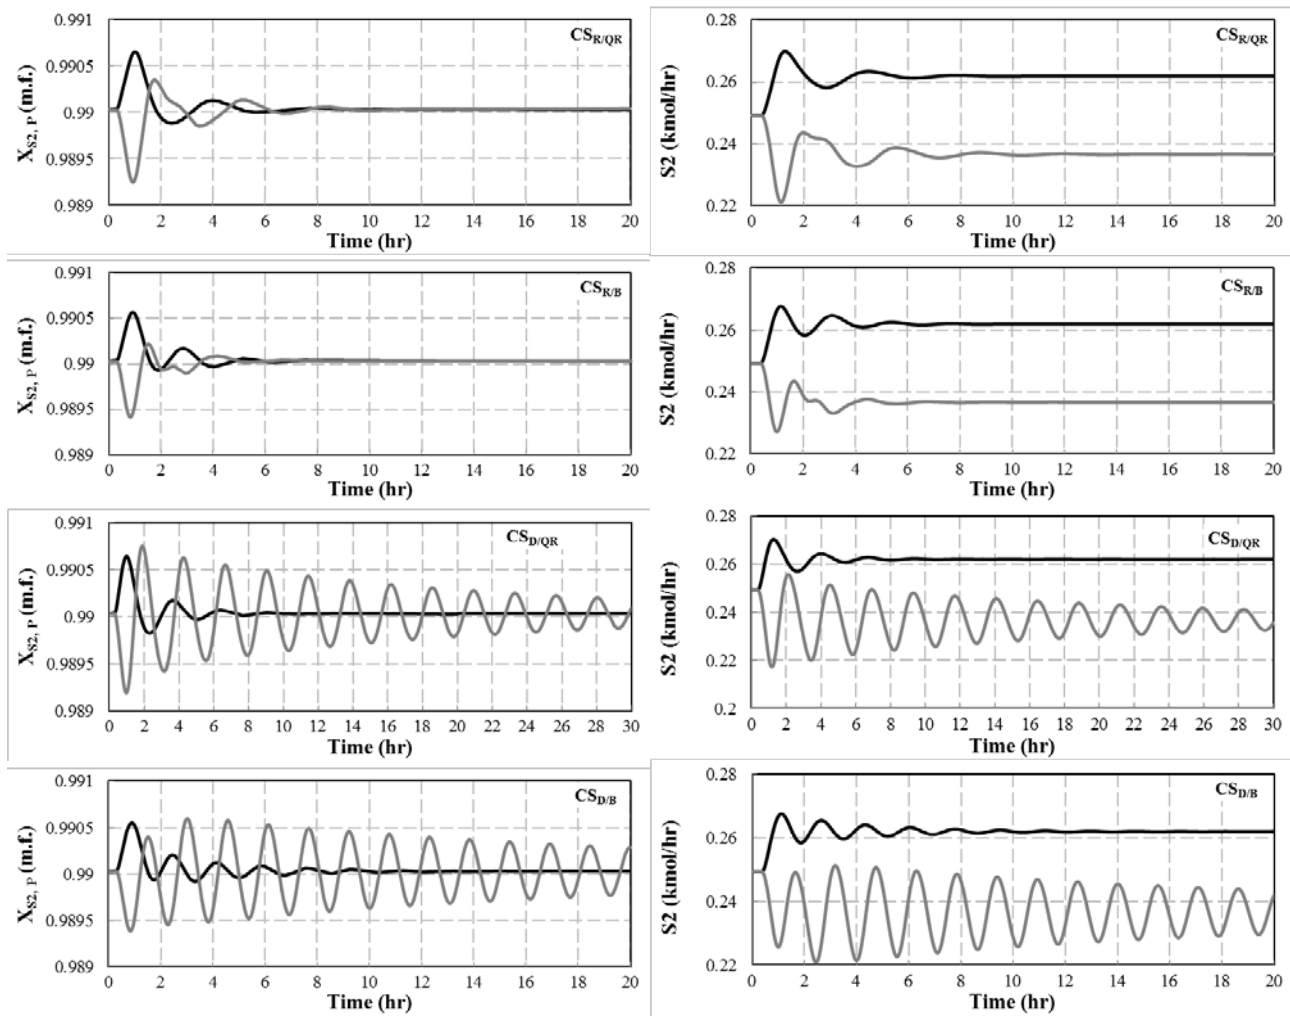

**Figure S12.** Dynamic responses of the lower sidestream control loop of the MEPB Kaibel distillation column controlled, respectively, under the  $CS_{R/QR}$ ,  $CS_{R/B}$ ,  $CS_{D/QR}$ , and  $CS_{D/B}$  structures after facing a  $\pm 5\%$  step change in  $P$  feed composition (+5%: black curves and -5%: grey curves): (a) controlled variables; (b) manipulated variables.

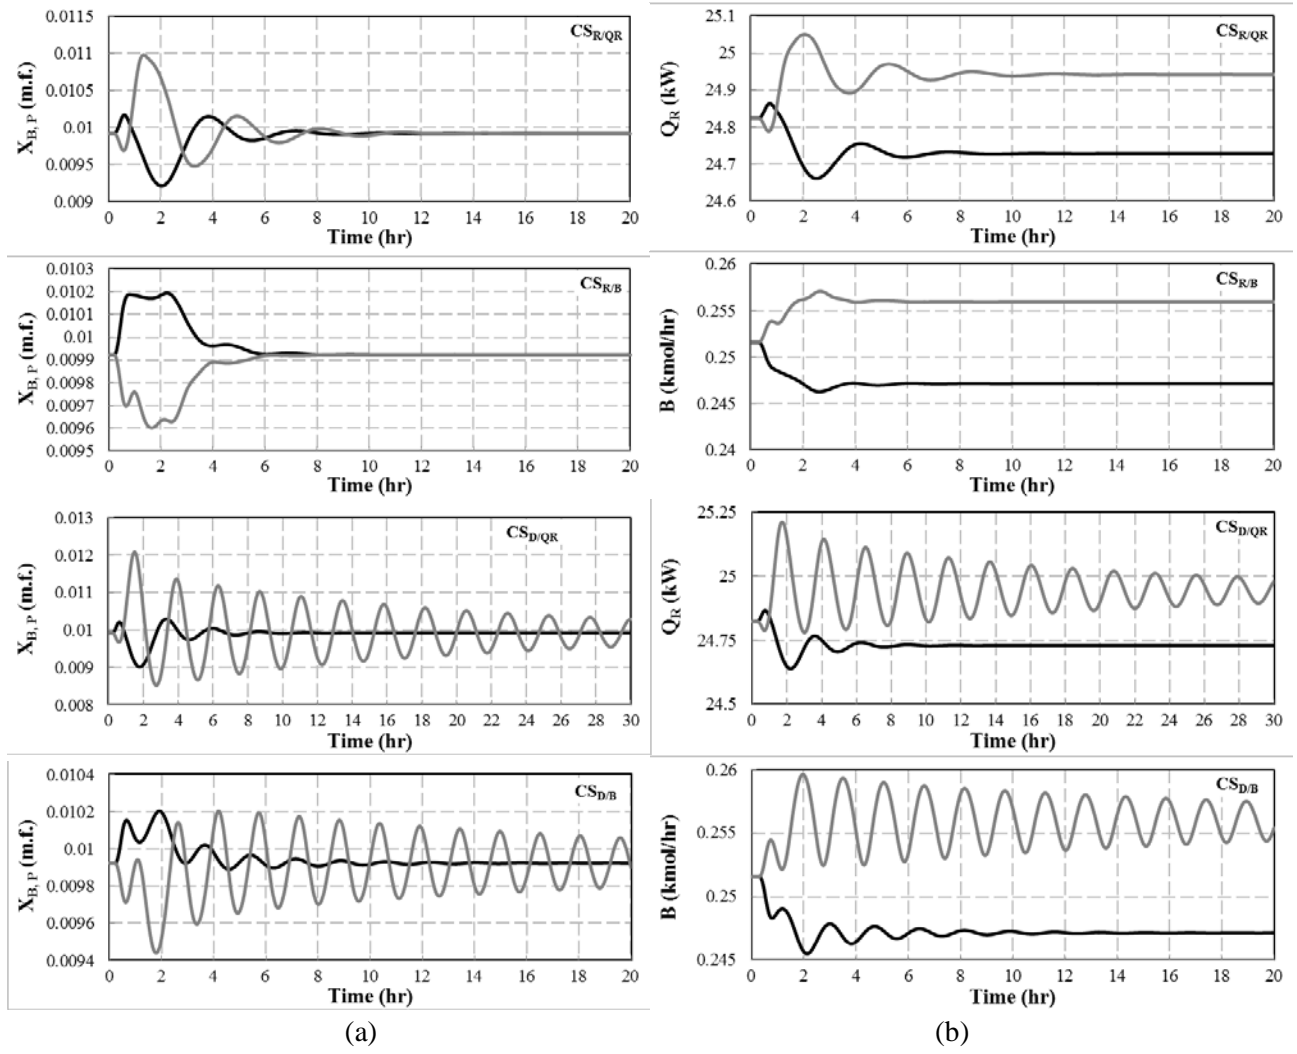

**Figure S13.** Dynamic responses of the bottom control loop of the MEPB Kaibel distillation column controlled, respectively, under the  $CS_{R/QR}$ ,  $CS_{R/B}$ ,  $CS_{D/QR}$ , and  $CS_{D/B}$  structures after facing a  $\pm 5\%$  step change in P feed composition ( $+5\%$ : black curves and  $-5\%$ : grey curves): (a) controlled variables; (b) manipulated variables.

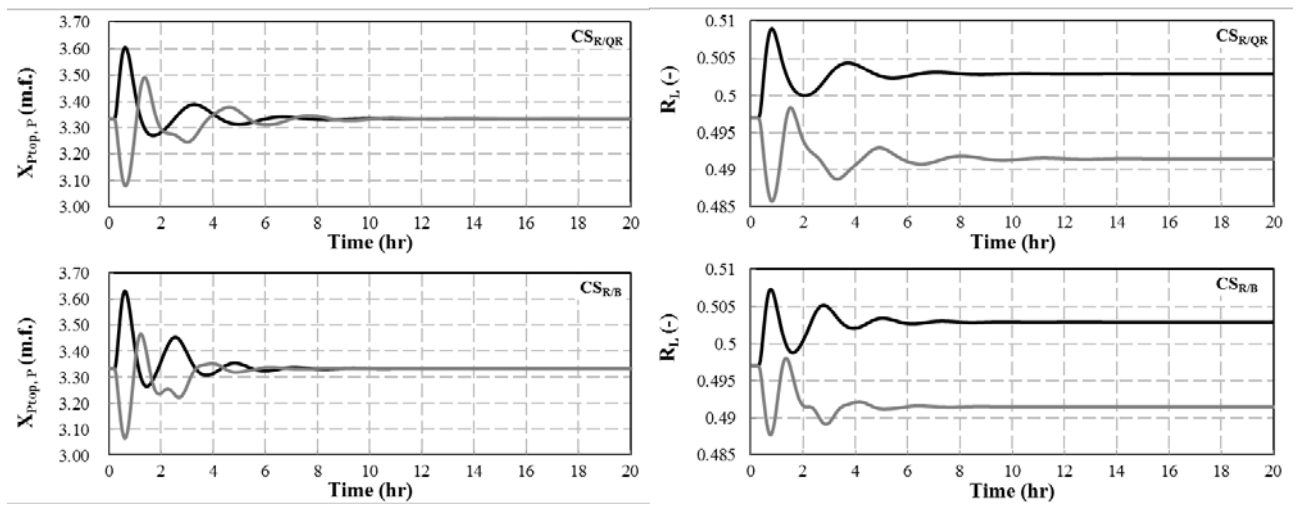

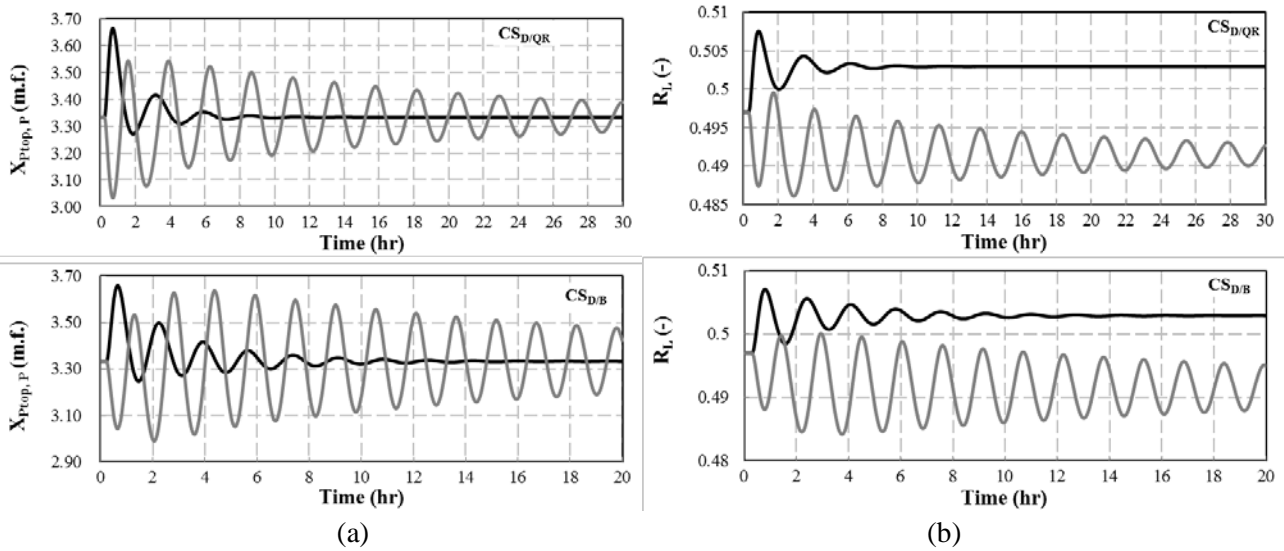

**Figure S14.** Dynamic responses of the prefractionator control loop of the MEPB Kaibel distillation column controlled, respectively, under the  $CS_{R/QR}$ ,  $CS_{R/B}$ ,  $CS_{D/QR}$ , and  $CS_{D/B}$  structures after facing a  $\pm 5\%$  step change in P feed composition (+5%: black curves and -5%: grey curves): (a) controlled variables; (b) manipulated variables.

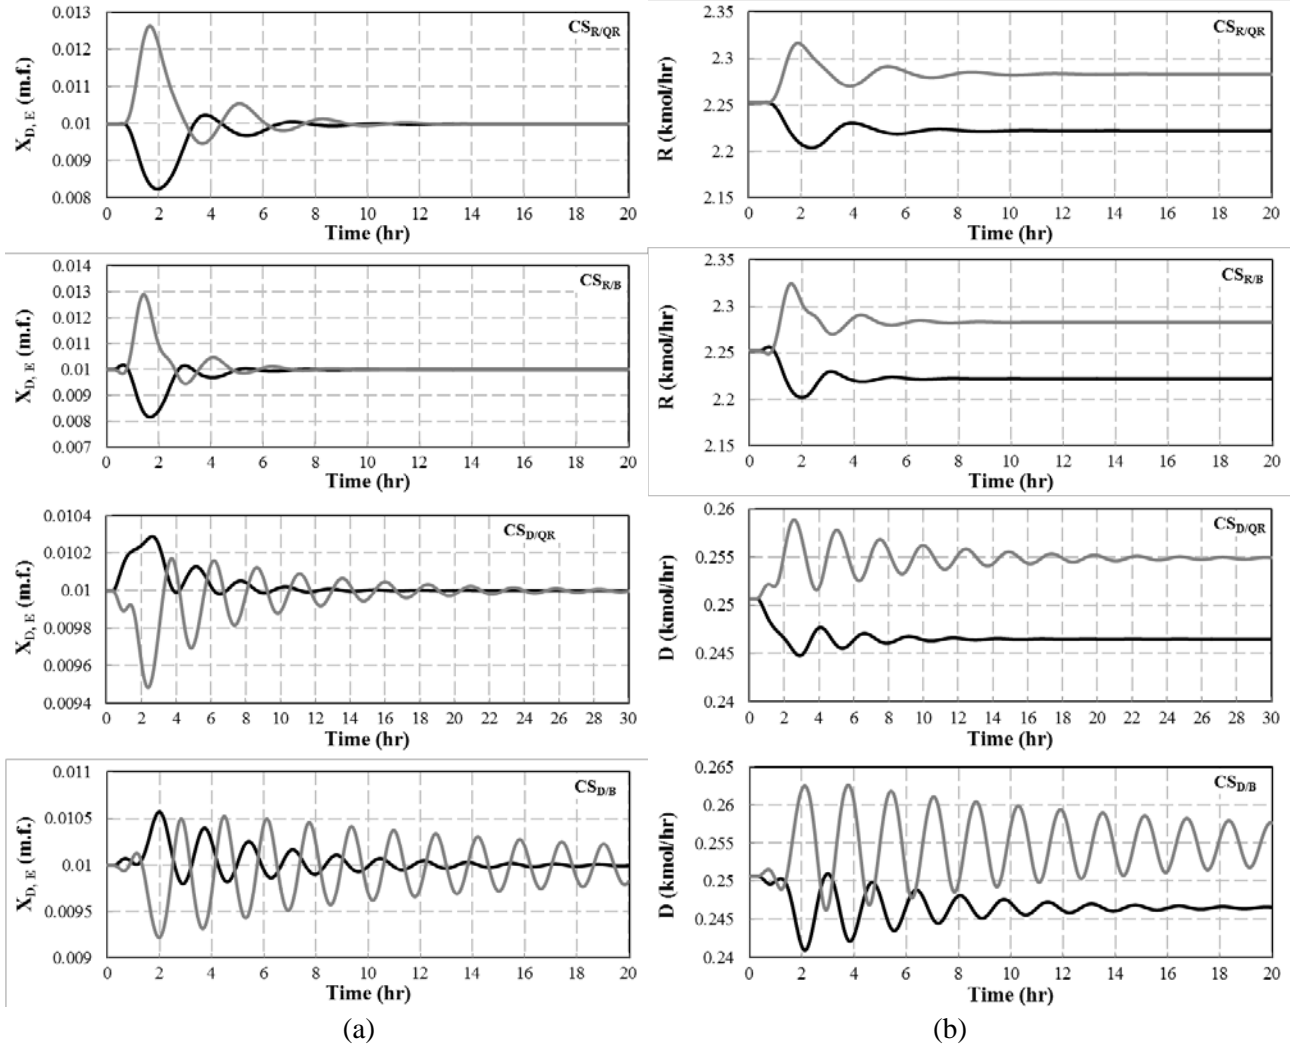

**Figure S15.** Dynamic responses of the top control loop of the MEPB Kaibel distillation column controlled, respectively, under the  $CS_{R/QR}$ ,  $CS_{R/B}$ ,  $CS_{D/QR}$ , and  $CS_{D/B}$  structures after facing a  $\pm 5\%$  step change in B feed composition (+5%: black curves and -5%: grey curves): (a) controlled variables; (b) manipulated variables.

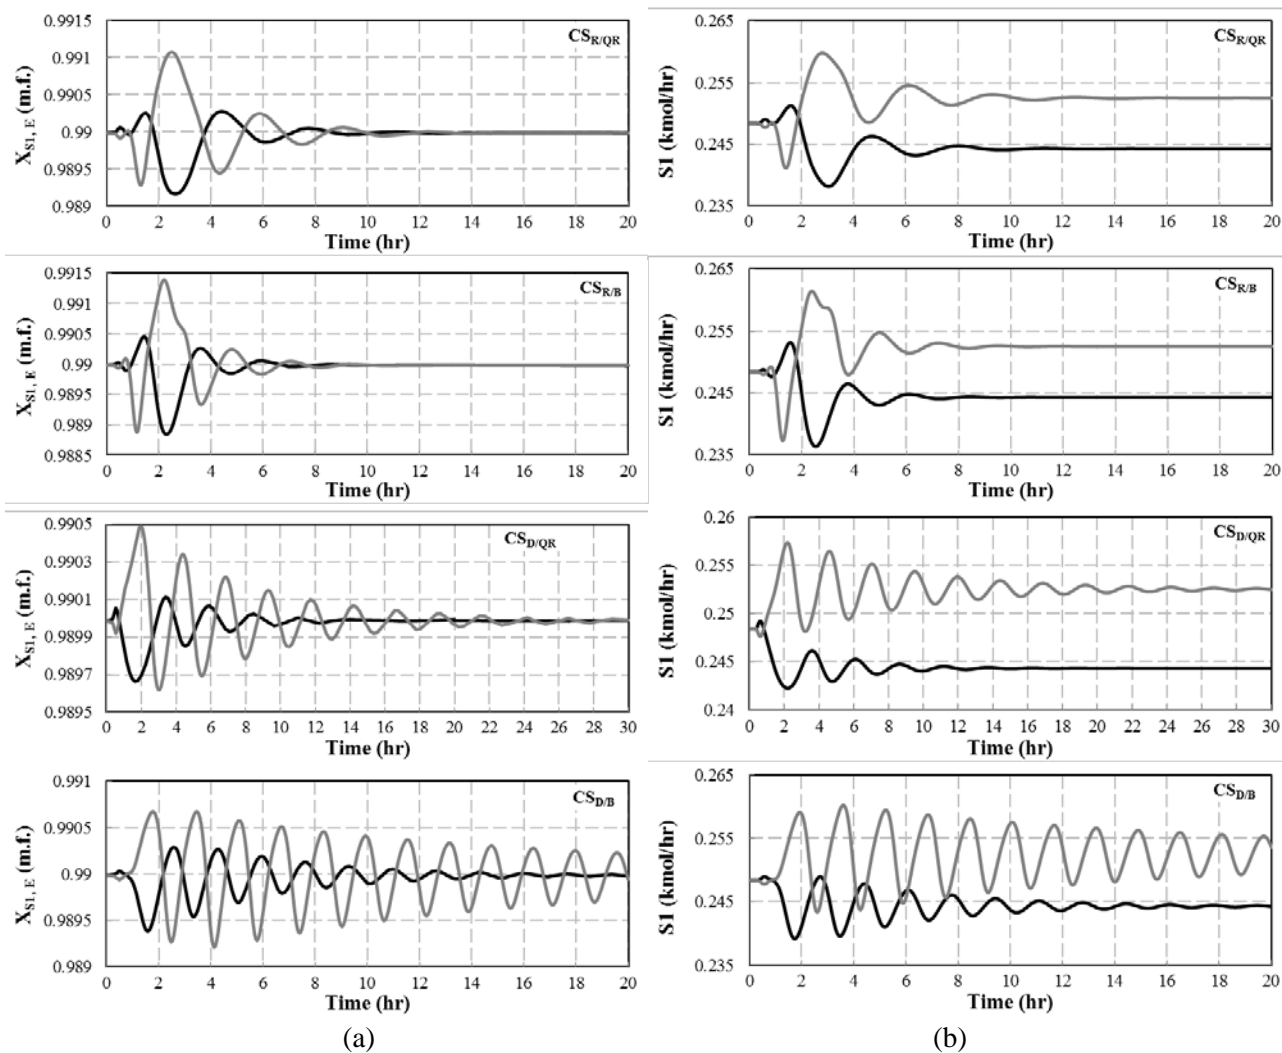

**Figure S16.** Dynamic responses of the upper sidestream control loop of the MEPB Kaibel distillation column controlled, respectively, under the  $CS_{R/QR}$ ,  $CS_{R/B}$ ,  $CS_{D/QR}$ , and  $CS_{D/B}$  structures after facing a  $\pm 5\%$  step change in B feed composition ( $+5\%$ : black curves and  $-5\%$ : grey curves): (a) controlled variables; (b) manipulated variables.

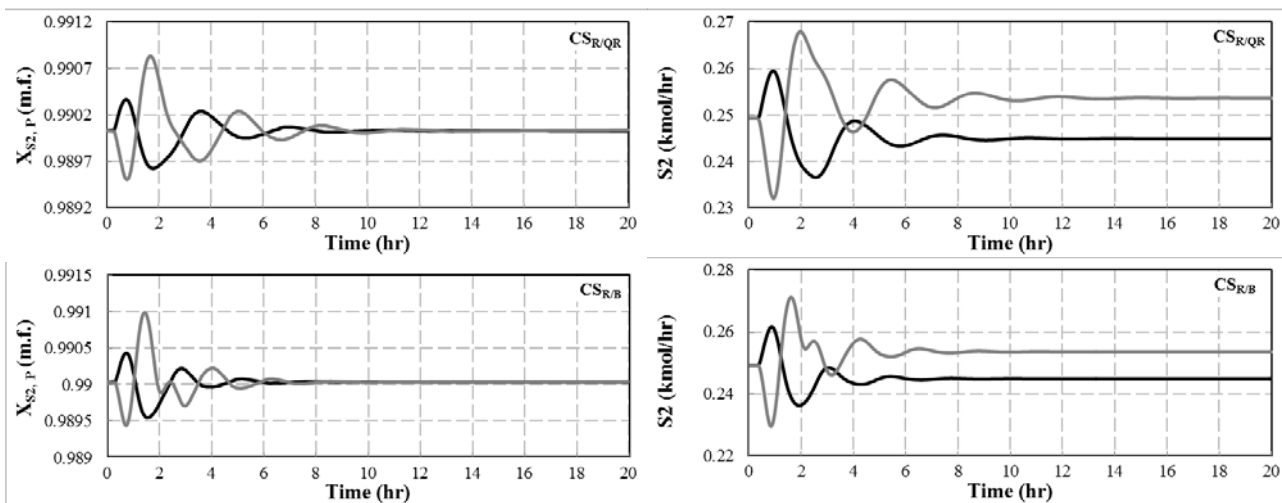

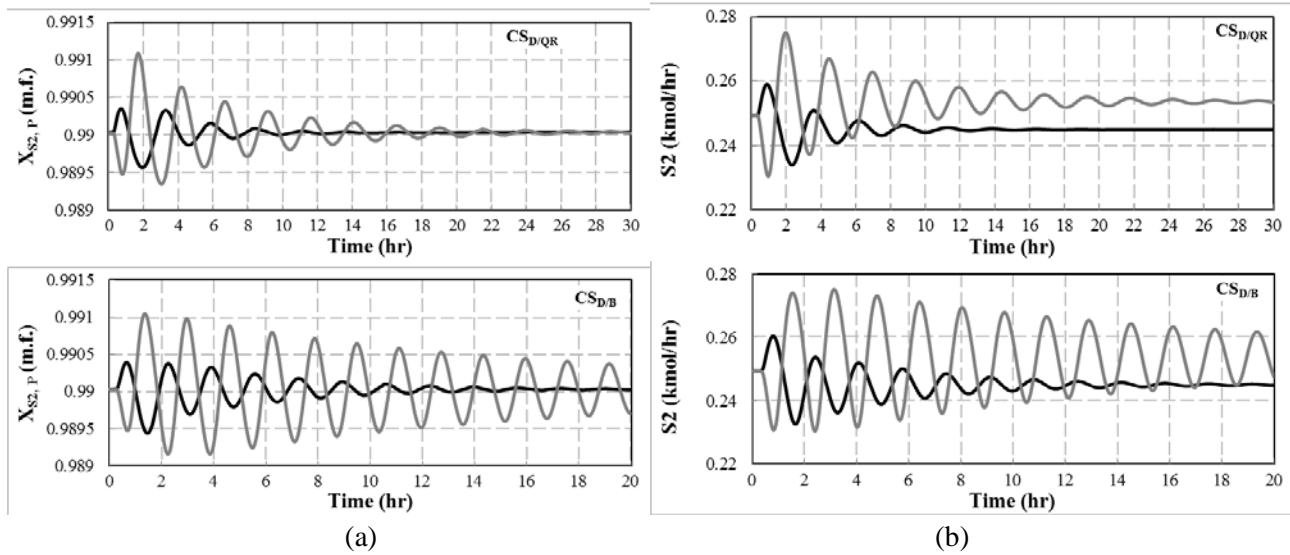

**Figure S17.** Dynamic responses of the lower sidestream control loop of the MEPB Kaibel distillation column controlled, respectively, under the  $CS_{R/QR}$ ,  $CS_{R/B}$ ,  $CS_{D/QR}$ , and  $CS_{D/B}$  structures after facing a  $\pm 5\%$  step change in B feed composition (+5%: black curves and -5%: grey curves): (a) controlled variables; (b) manipulated variables.

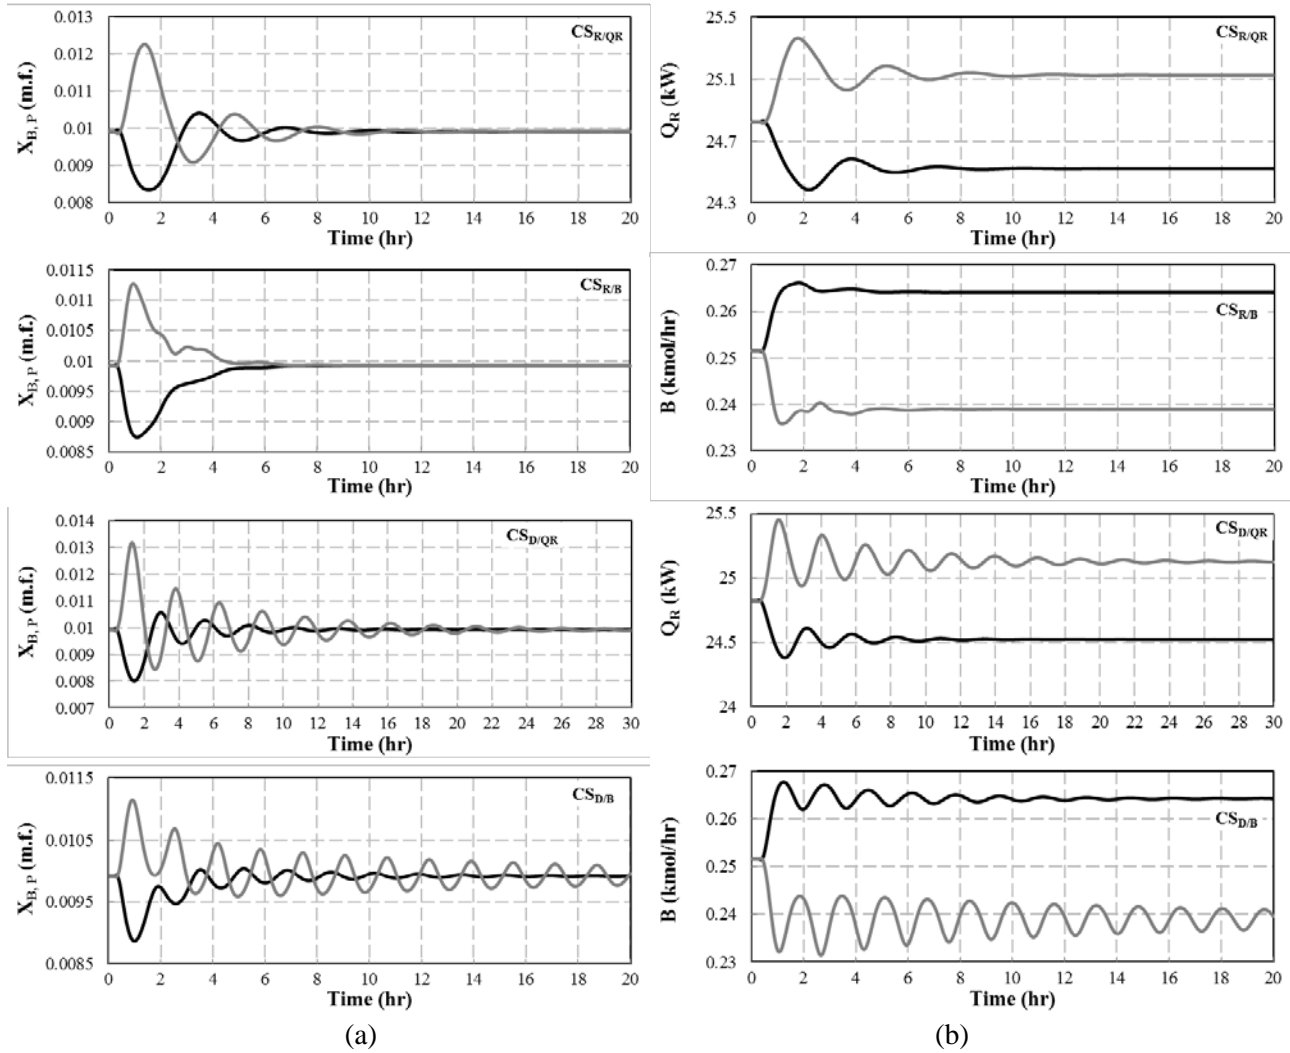

**Figure S18.** Dynamic responses of the bottom control loop of the MEPB Kaibel distillation column controlled, respectively, under the  $CS_{R/QR}$ ,  $CS_{R/B}$ ,  $CS_{D/QR}$ , and  $CS_{D/B}$  structures after facing a  $\pm 5\%$  step change in B feed composition (+5%: black curves and -5%: grey curves): (a) controlled variables; (b) manipulated variables.

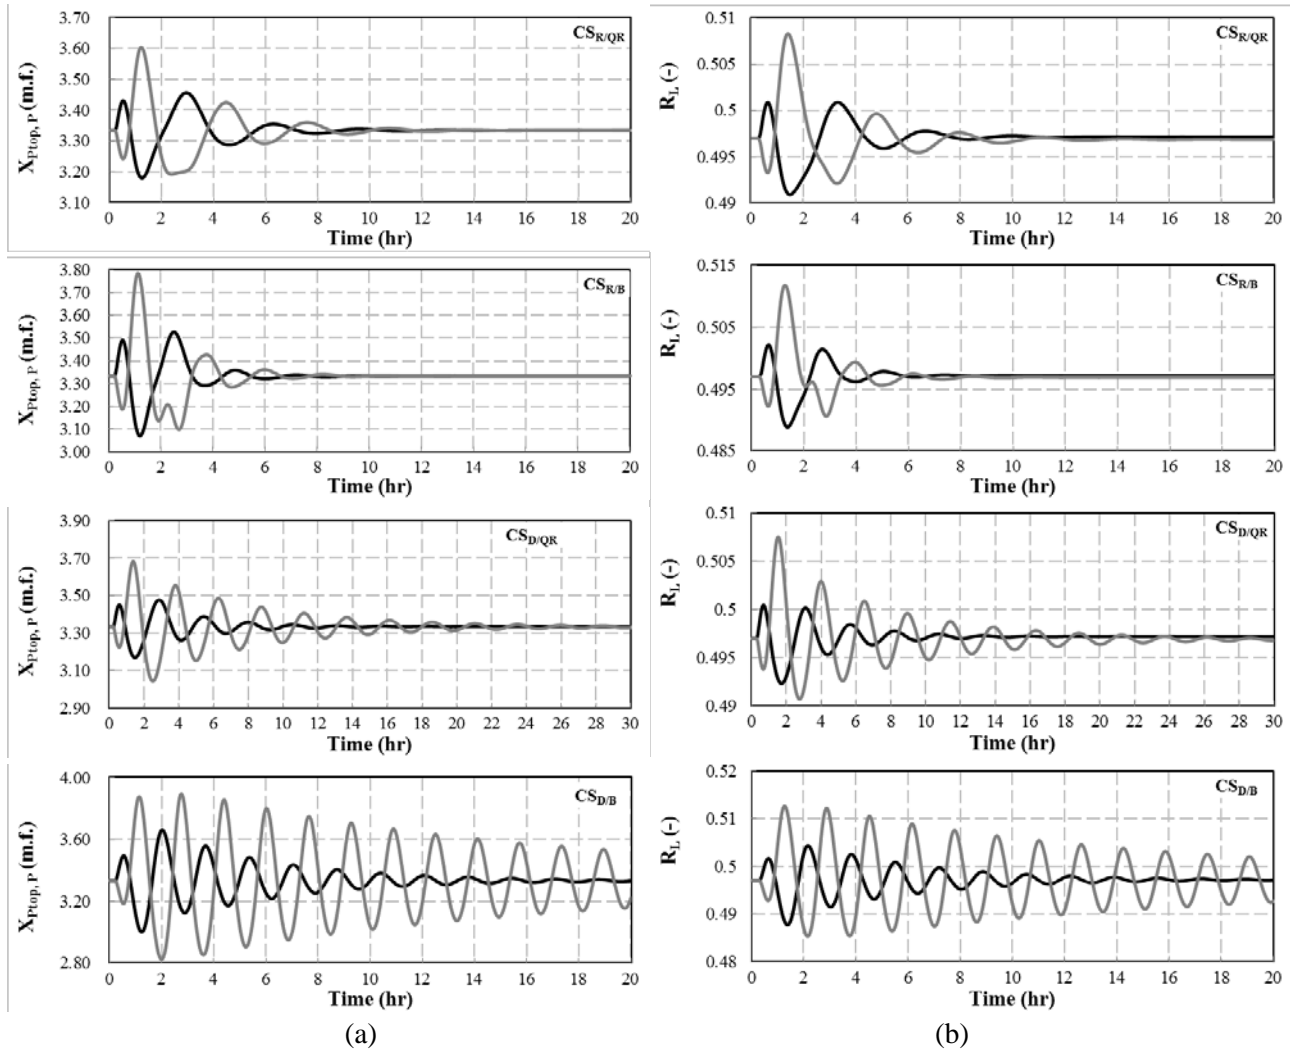

**Figure S19.** Dynamic responses of the prefractional control loop of the MEPB Kaibel distillation column controlled, respectively, under the  $CS_{R/QR}$ ,  $CS_{R/B}$ ,  $CS_{D/QR}$ , and  $CS_{D/B}$  structures after facing a  $\pm 5\%$  step change in B feed composition (+5%: black curves and -5%: grey curves): (a) controlled variables; (b) manipulated variables.

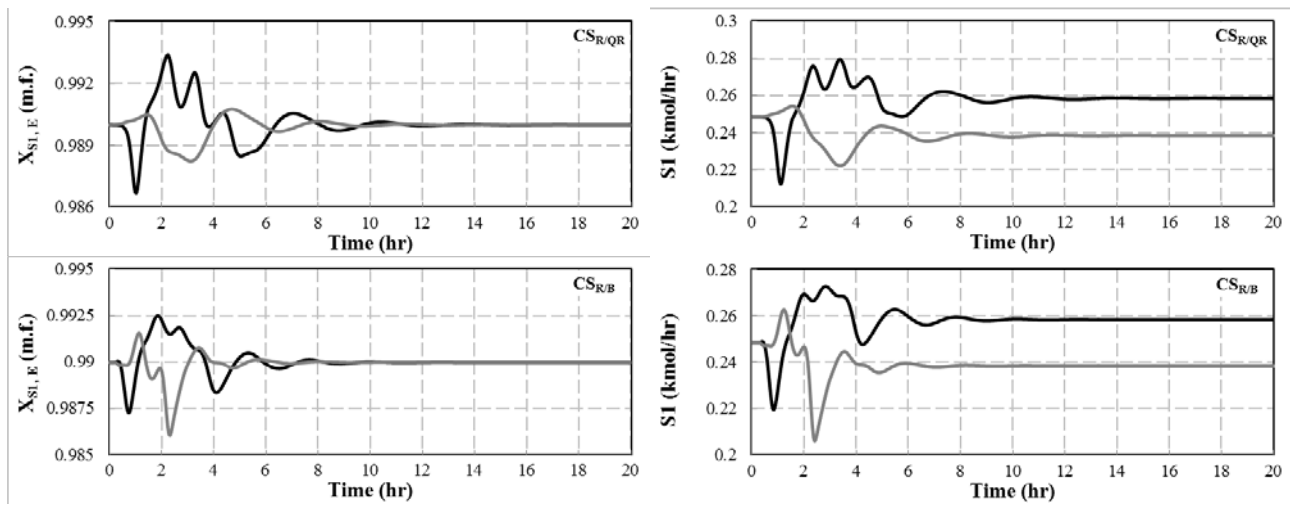

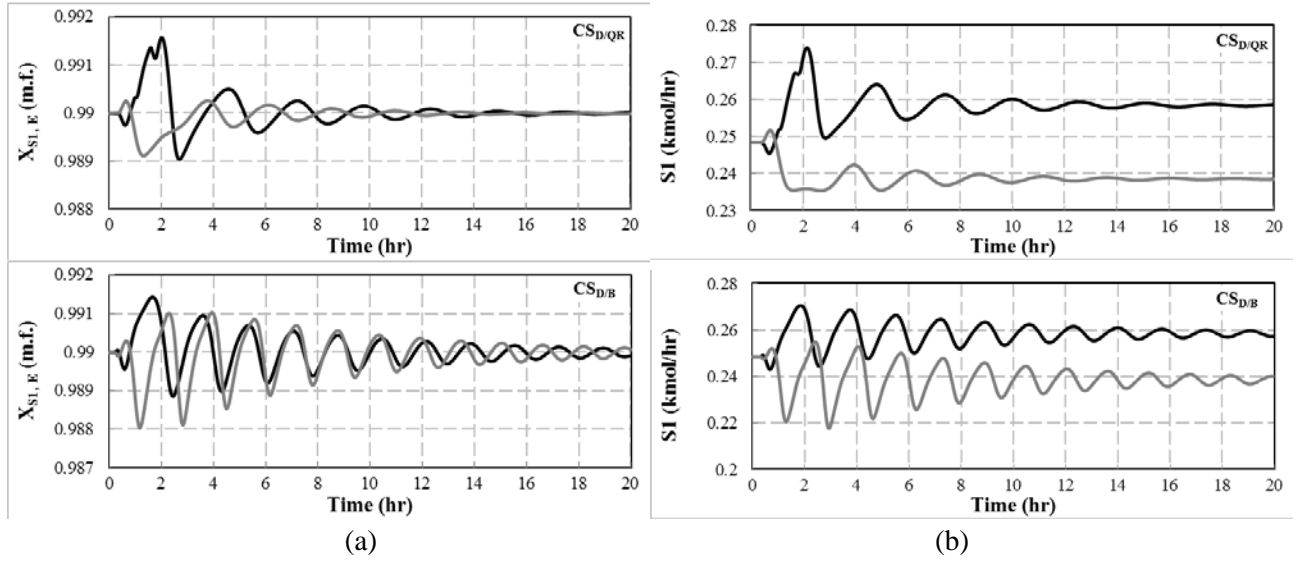

**Figure S20.** Dynamic responses of the upper sidestream control loop of the MEPB Kaibel distillation column controlled, respectively, under the  $CS_{R/QR}$ ,  $CS_{R/B}$ ,  $CS_{D/QR}$ , and  $CS_{D/B}$  structures after facing a  $\pm 5\%$  step change in feed flow rate (+5%: black curves and -5%: grey curves): (a) controlled variables; (b) manipulated variables.

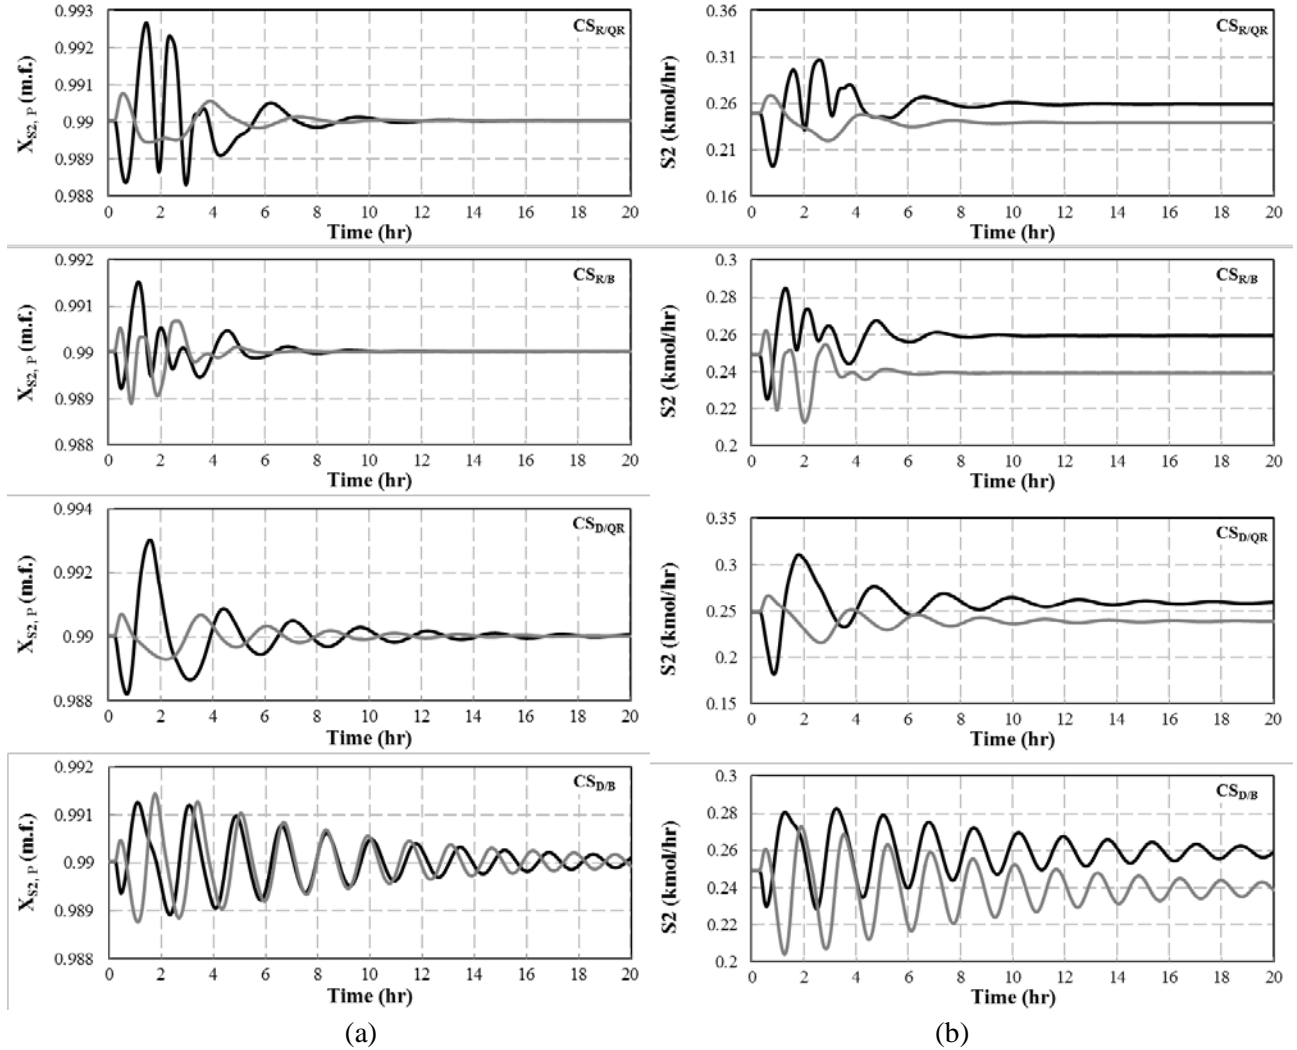

**Figure S21.** Dynamic responses of the lower sidestream control loop of the MEPB Kaibel distillation column controlled, respectively, under the  $CS_{R/QR}$ ,  $CS_{R/B}$ ,  $CS_{D/QR}$ , and  $CS_{D/B}$  structures after facing a  $\pm 5\%$  step change in feed flow rate (+5%: black curves and -5%: grey curves): (a) controlled variables; (b) manipulated variables.



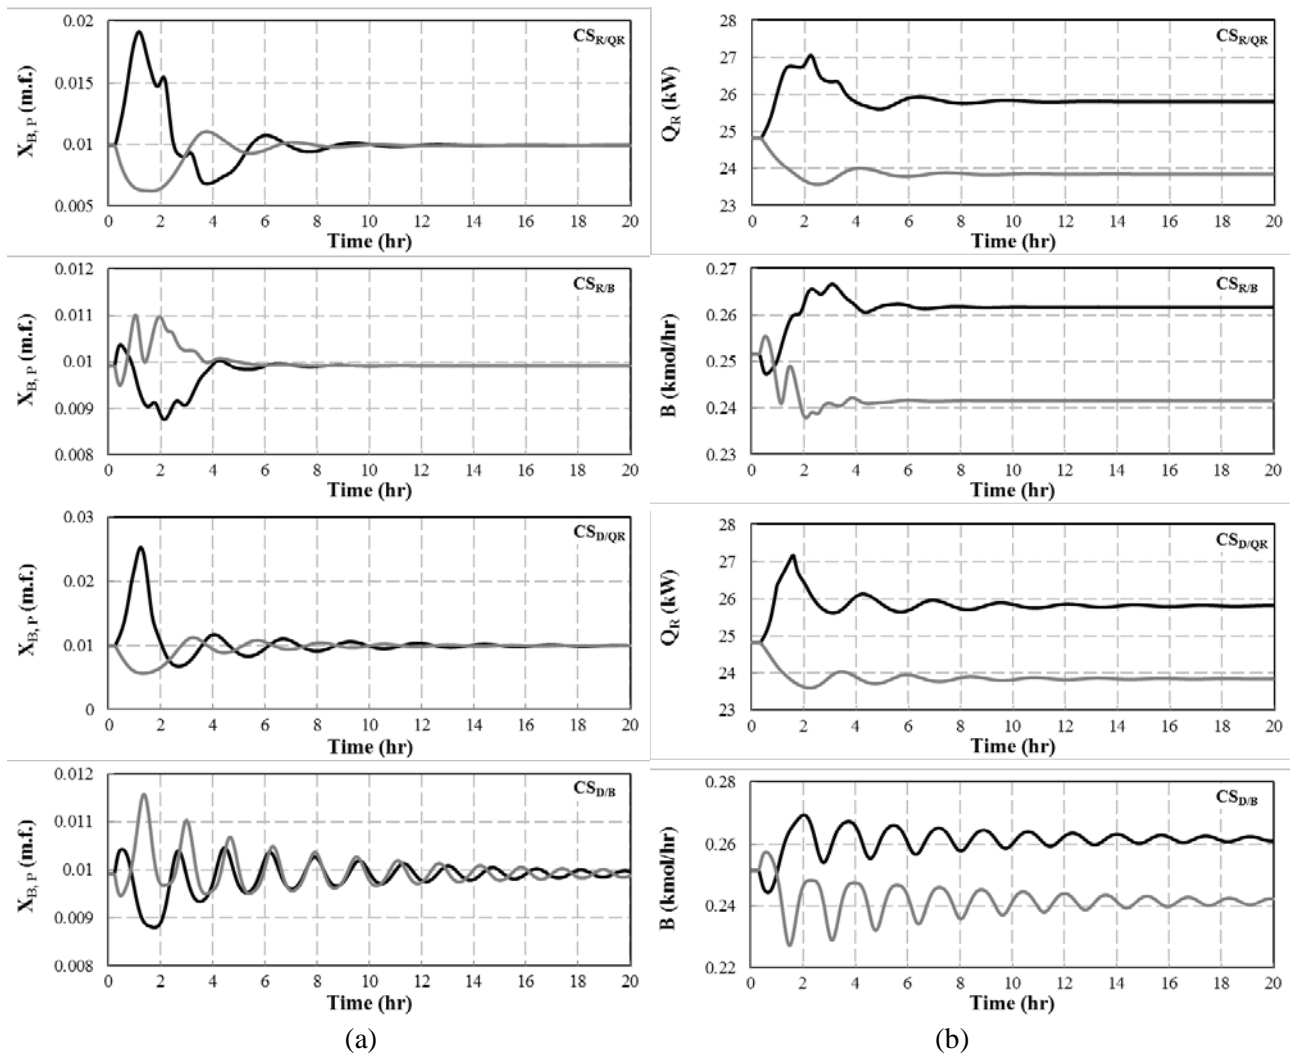

**Figure S22.** Dynamic responses of the bottom control loop of the MEPB Kaibel distillation column controlled, respectively, under the  $CS_{R/QR}$ ,  $CS_{R/B}$ ,  $CS_{D/QR}$ , and  $CS_{D/B}$  structures after facing a  $\pm 5\%$  step change in feed flow rate ( $+5\%$ : black curves and  $-5\%$ : grey curves): (a) controlled variables; (b) manipulated variables.

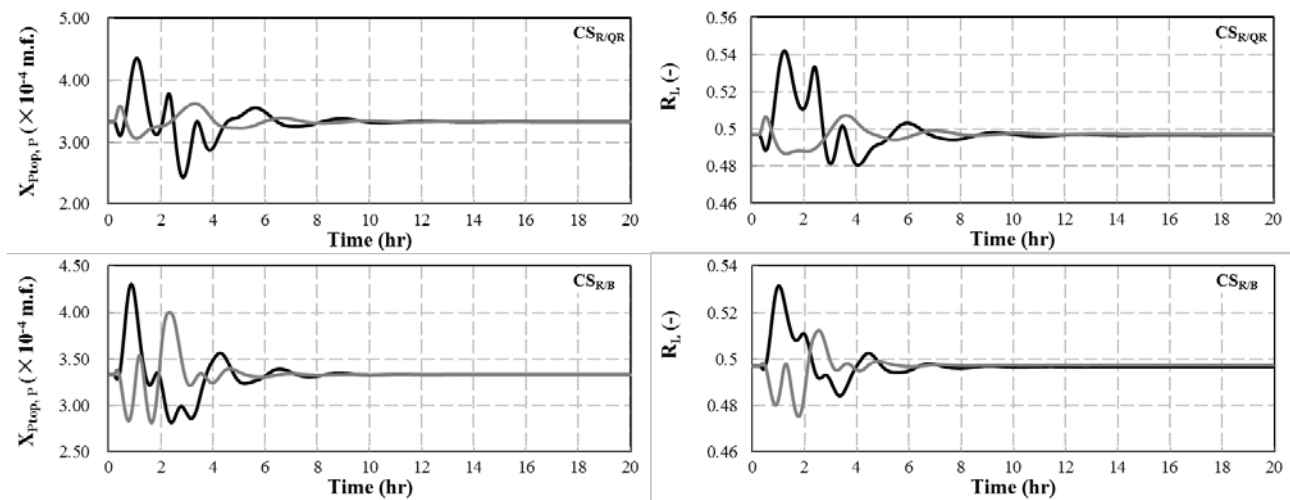

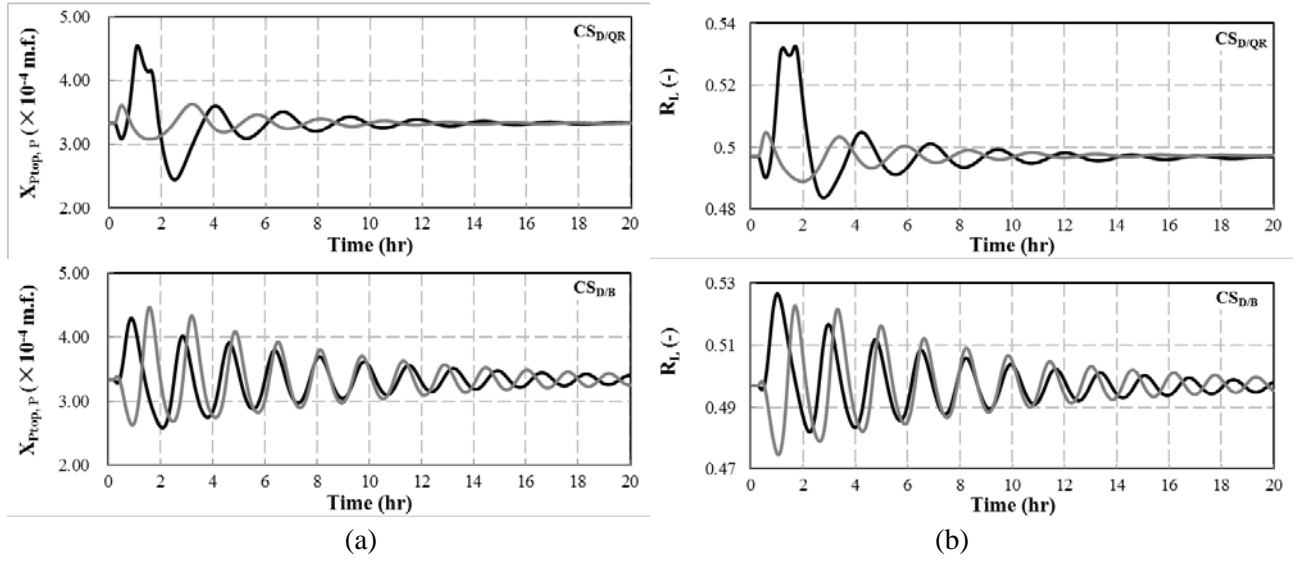

**Figure S23.** Dynamic responses of the prefractionator control loop of the MEPB Kaibel distillation column controlled, respectively, under the  $CS_{R/QR}$ ,  $CS_{R/B}$ ,  $CS_{D/QR}$ , and  $CS_{D/B}$  structures after facing a  $\pm 5\%$  step change in feed flow rate (+5%: black curves and -5%: grey curves): (a) controlled variables; (b) manipulated variables.
